# Supplementary material for: Allelopathic interactions between the brown algal genus Lobophora (Dictyotales, Phaeophyceae) and scleractinian corals
Source: PubMed Central journal article supplement (PMC4700470; doi:10.1038/srep18637), 2016-01-05
Supplement: srep18637-s1.pdf [file srep18637-s1.pdf]

## Supplementary Information

### **Allelopathic interactions between the brown algal genus *Lobophora* (Dictyotales, Phaeophyceae) and scleractinian corals**

*Christophe Vieira, Olivier P. Thomas, Gérald Culioli, Grégory Genta-Jouve, Fanny Houlbreque, Julie Gaubert, Olivier De Clerck, Claude E. Payri*

NMR spectra of compounds 1-3

HR-(+)ESIMS spectra of compounds 1-3

Assessment of the relative seafloor cover and quantification of *Lobophora*-corals association

Sampling locations of *Lobophora* species in New Caledonia

Picture of *in situ* bioassays.

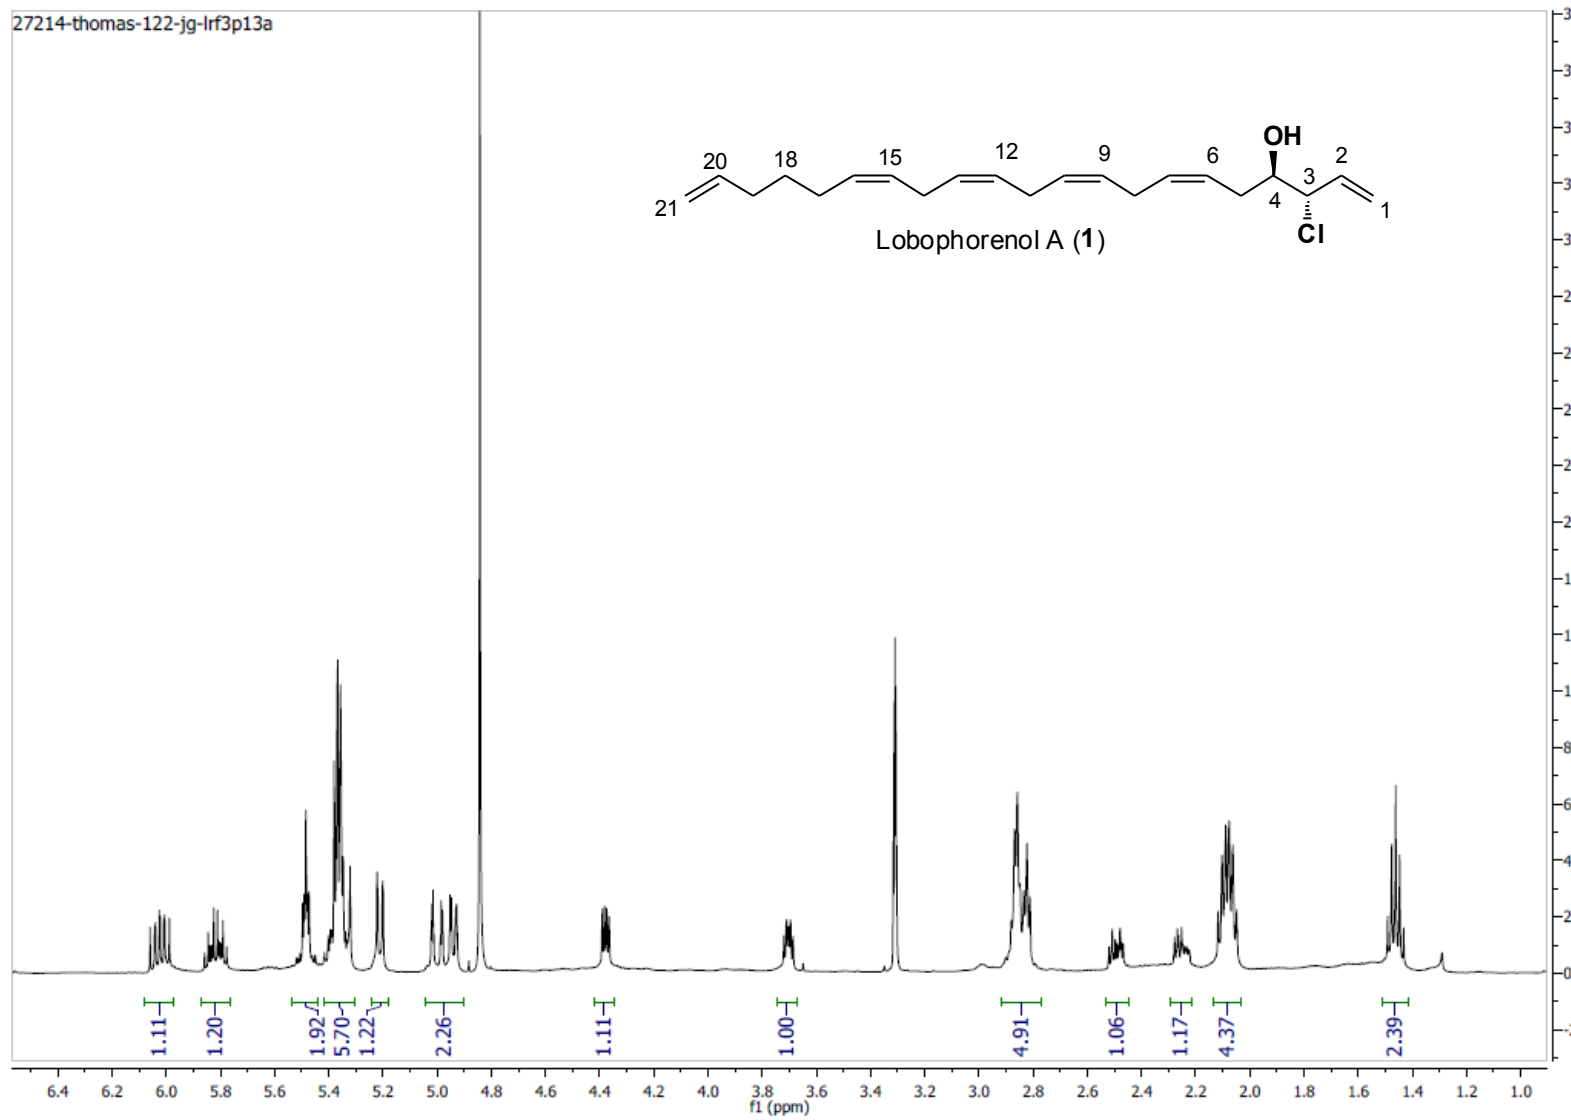

$^1\text{H}$  NMR spectrum of **1** in  $\text{CD}_3\text{OD}$  at 500 MHz

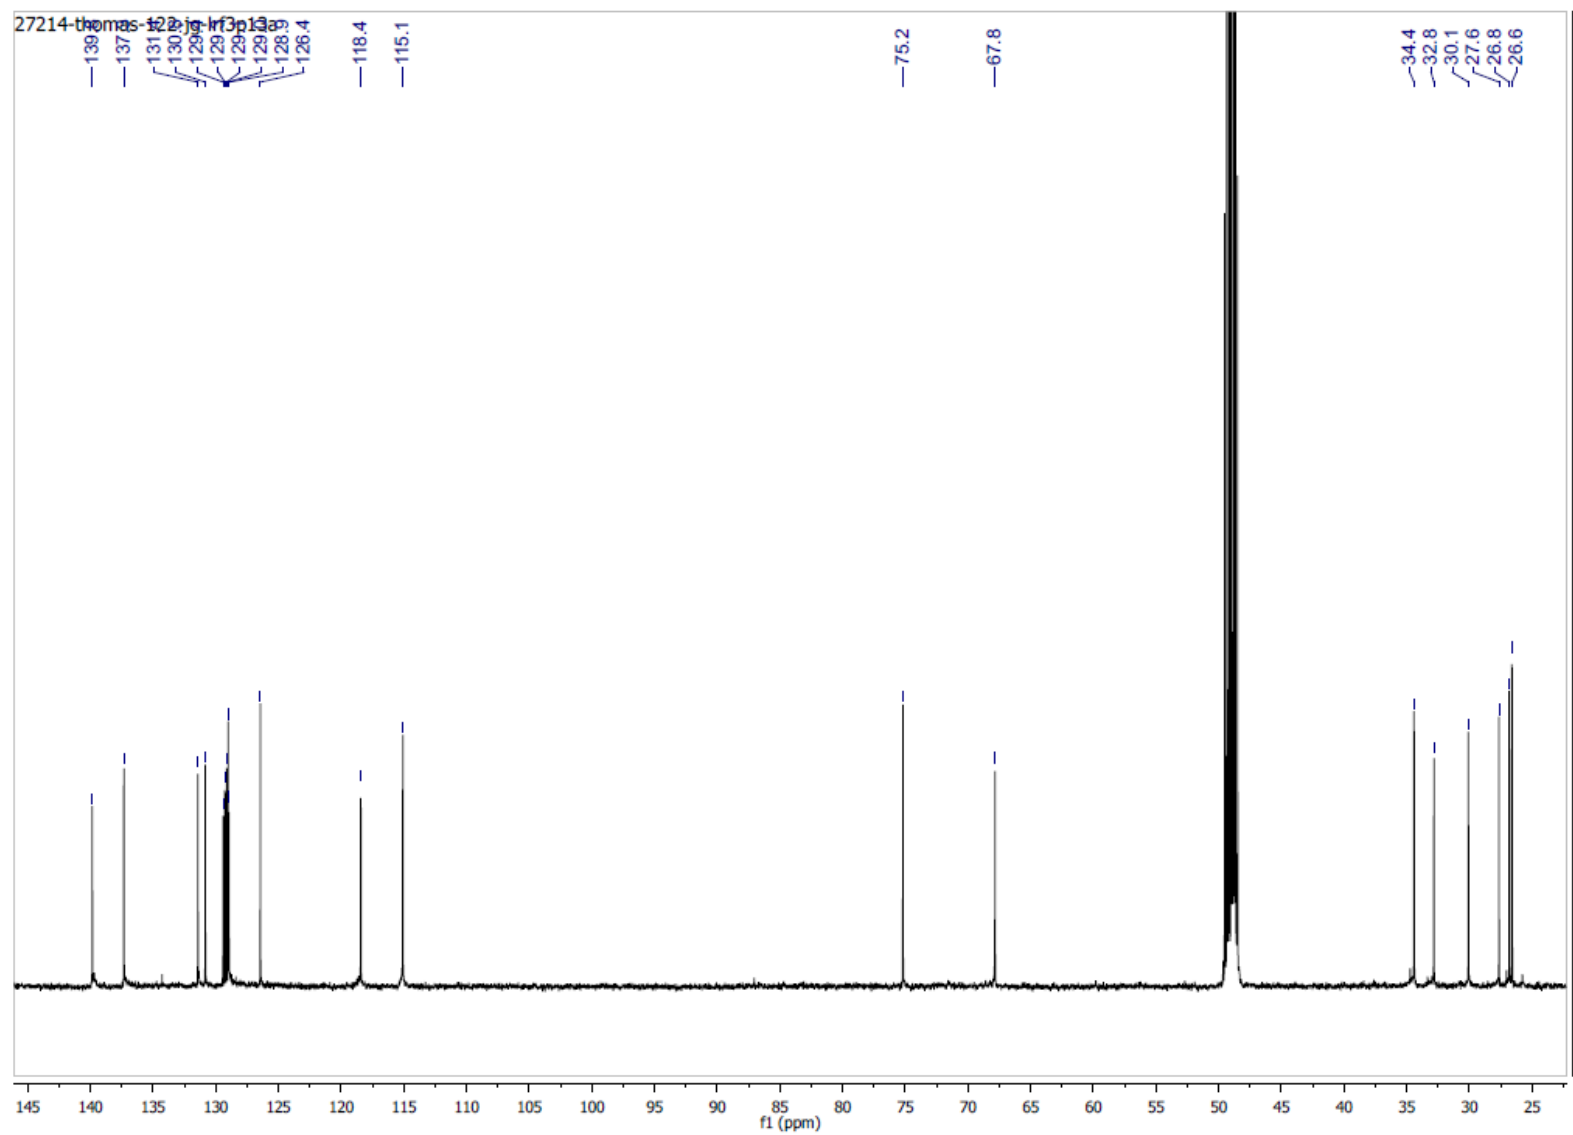

$^{13}\text{C}$  NMR spectrum of **1** in  $\text{CD}_3\text{OD}$  at 125 MHz

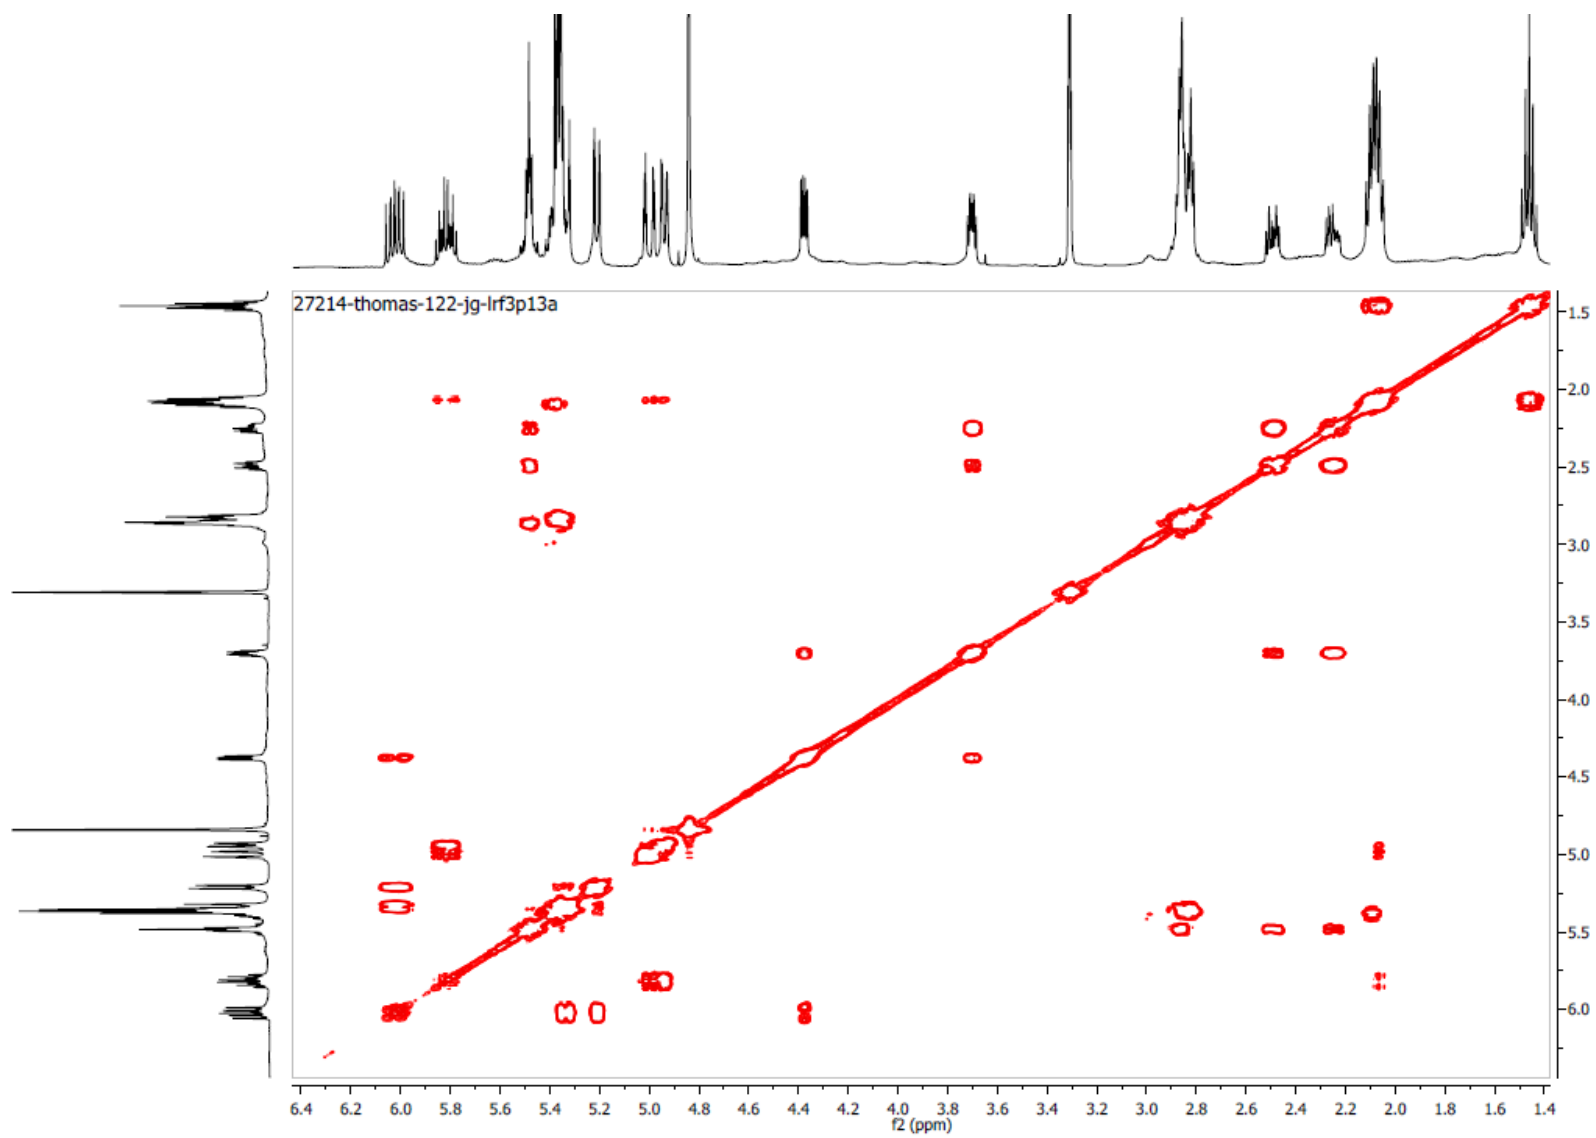

COSY NMR spectrum of **1** in CD<sub>3</sub>OD (500 MHz)

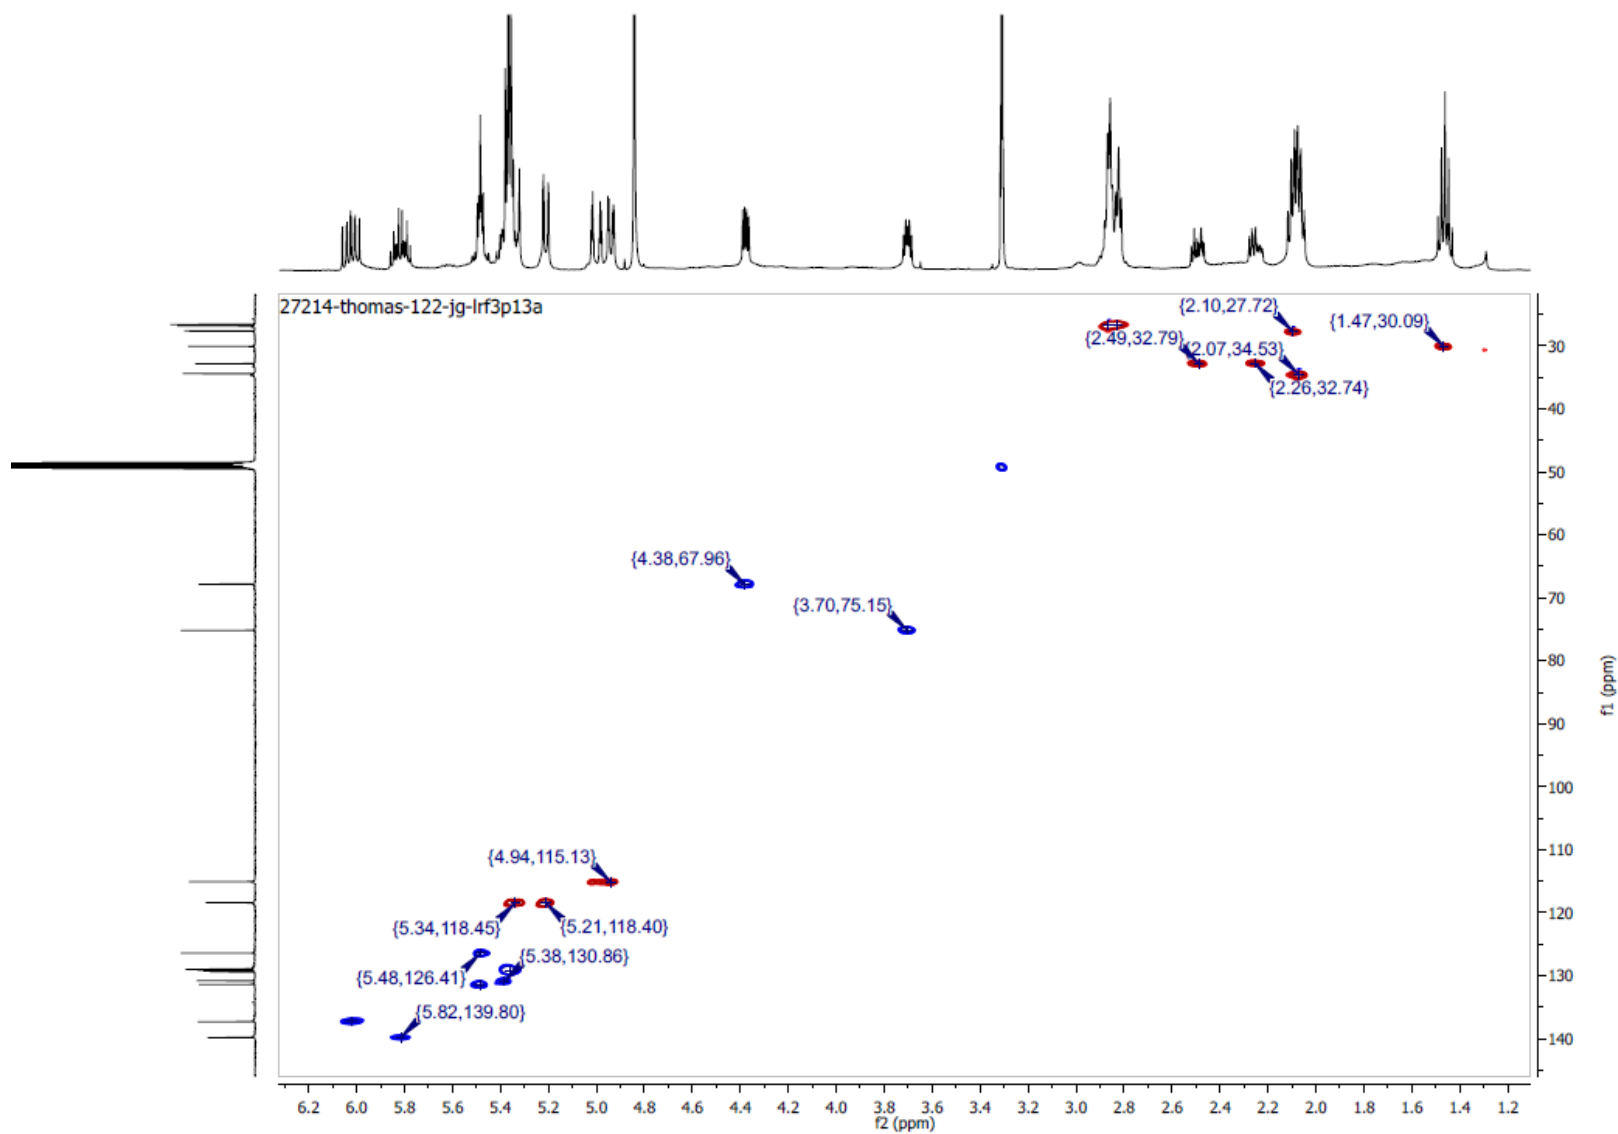

HSQC NMR spectrum of **1** in CD<sub>3</sub>OD (500 MHz)

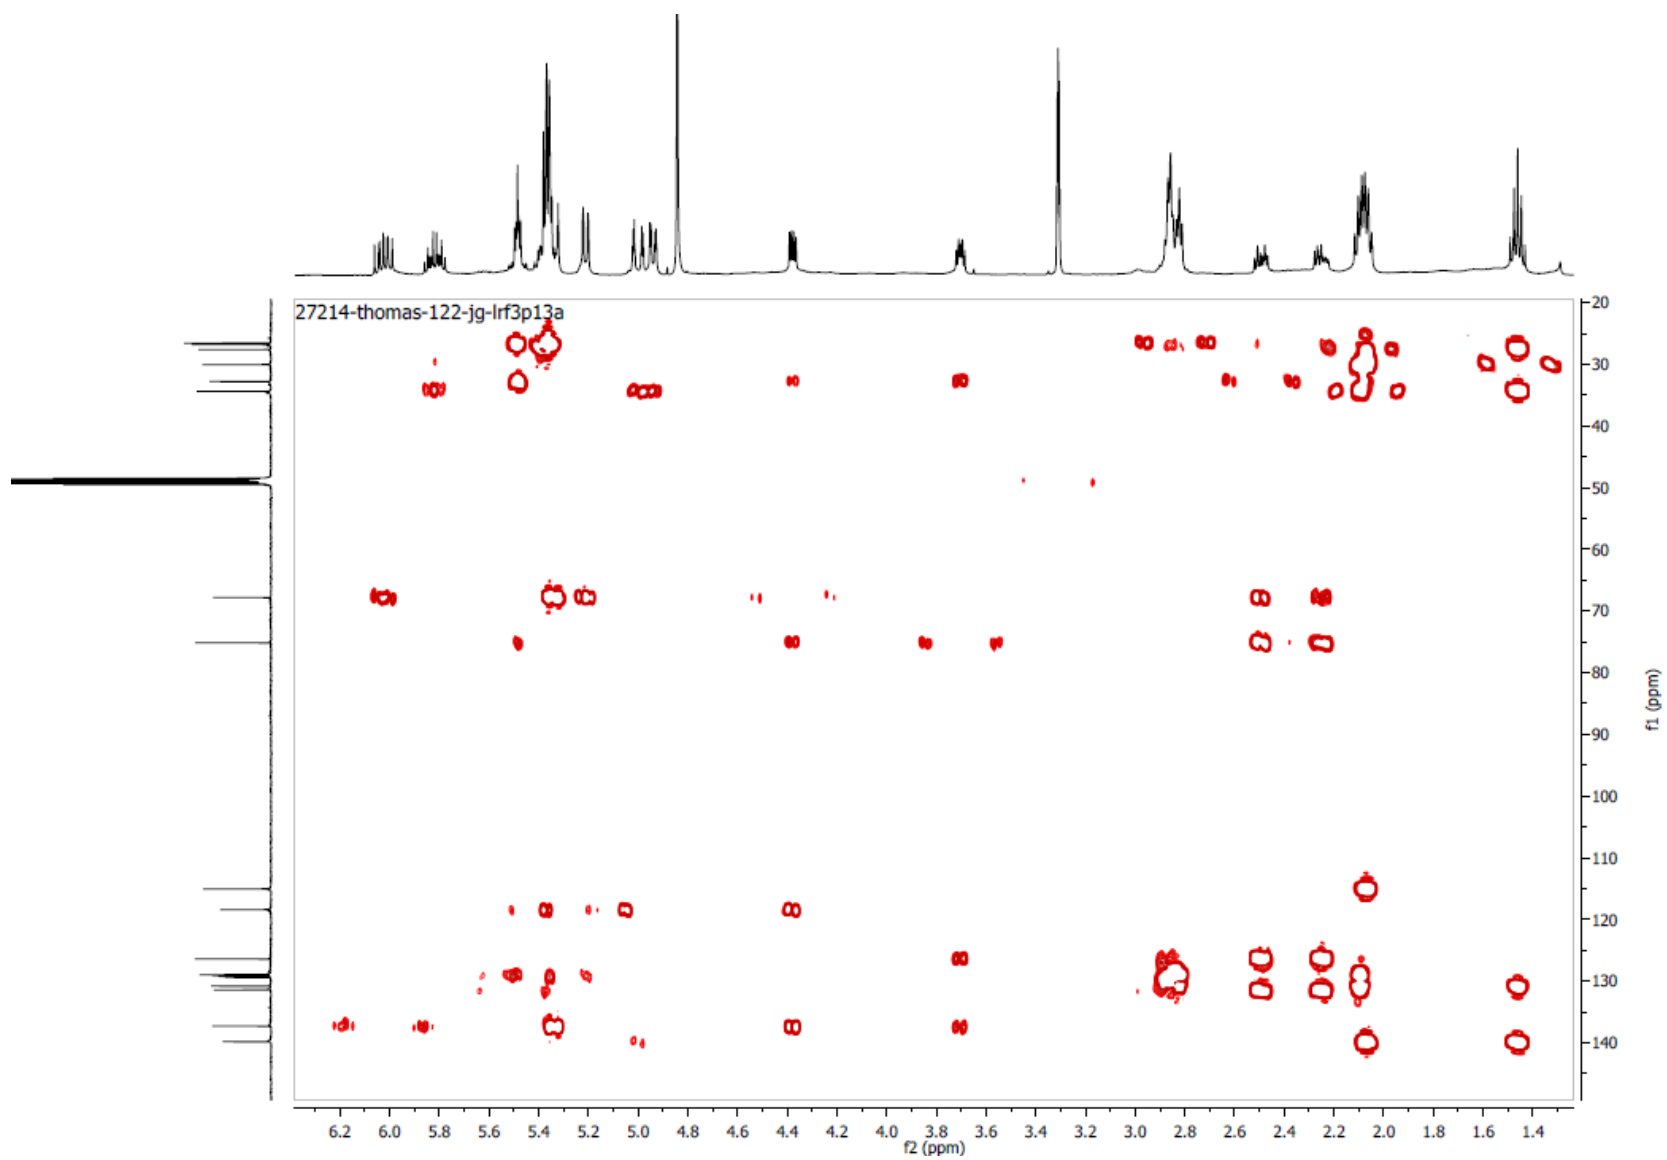

HMBC NMR spectrum of **1** in CD<sub>3</sub>OD (500 MHz)

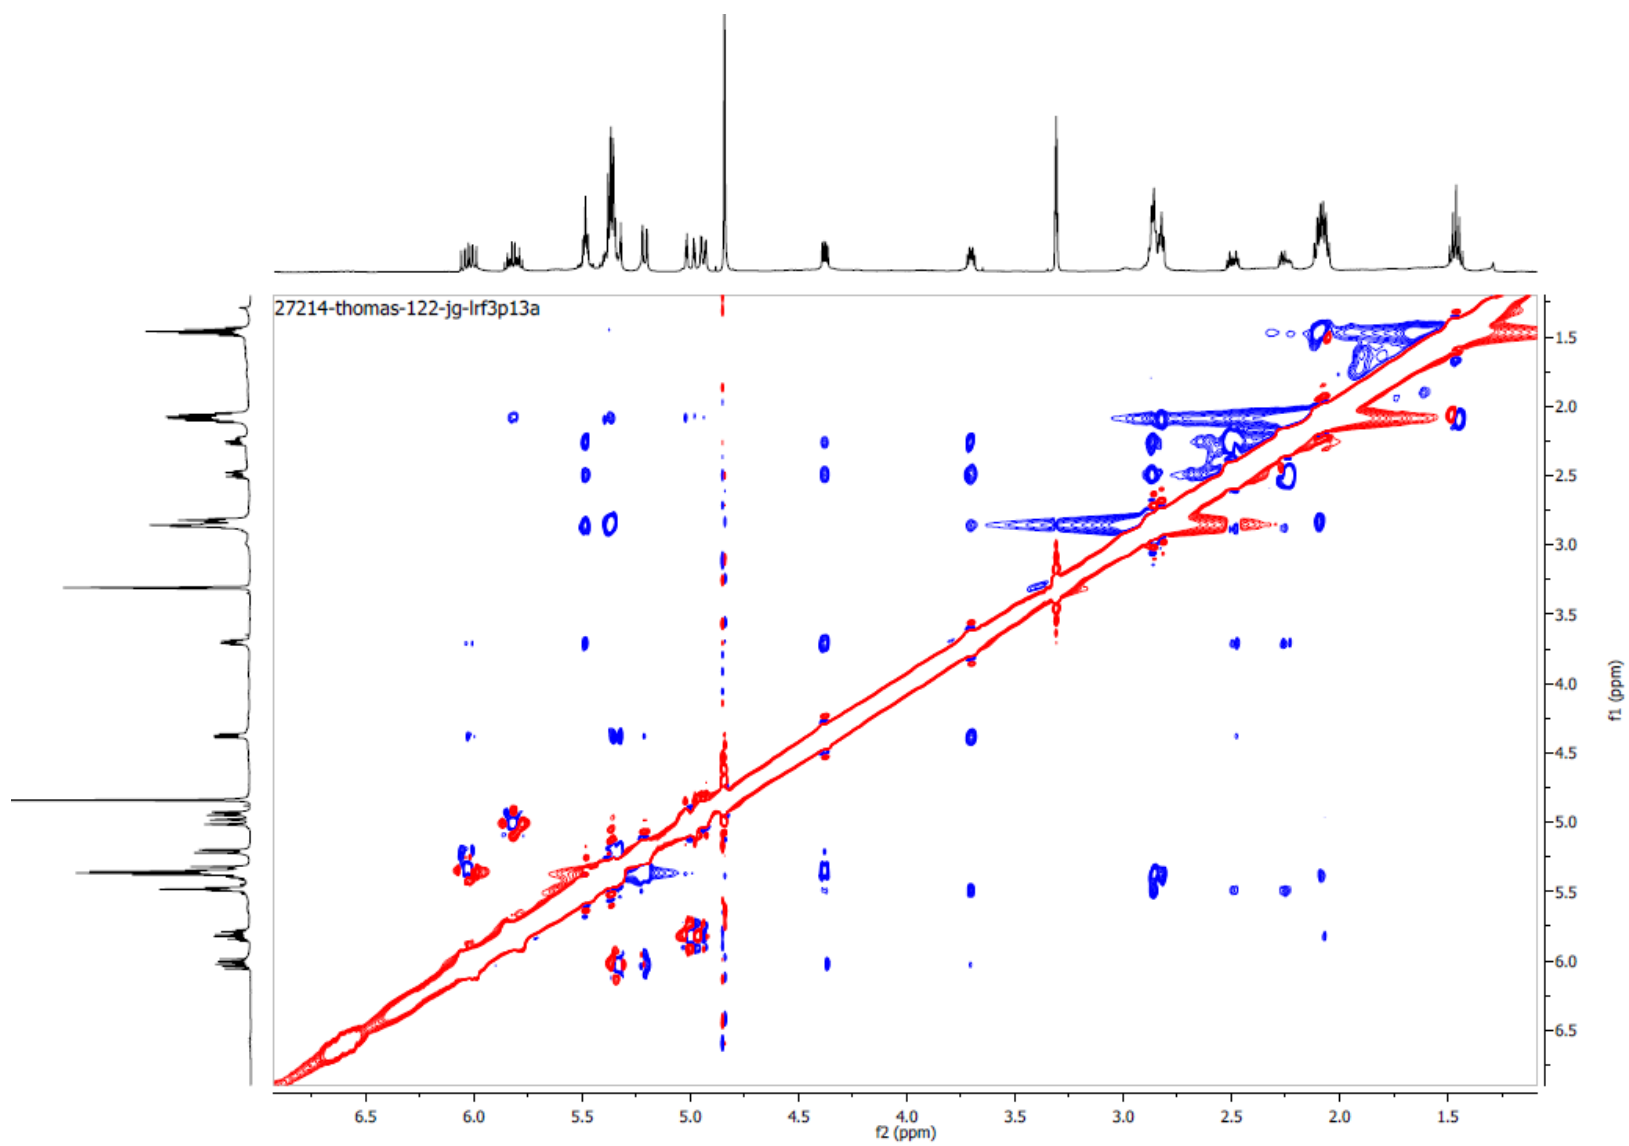

NOESY NMR spectrum of **1** in CD<sub>3</sub>OD (500 MHz)

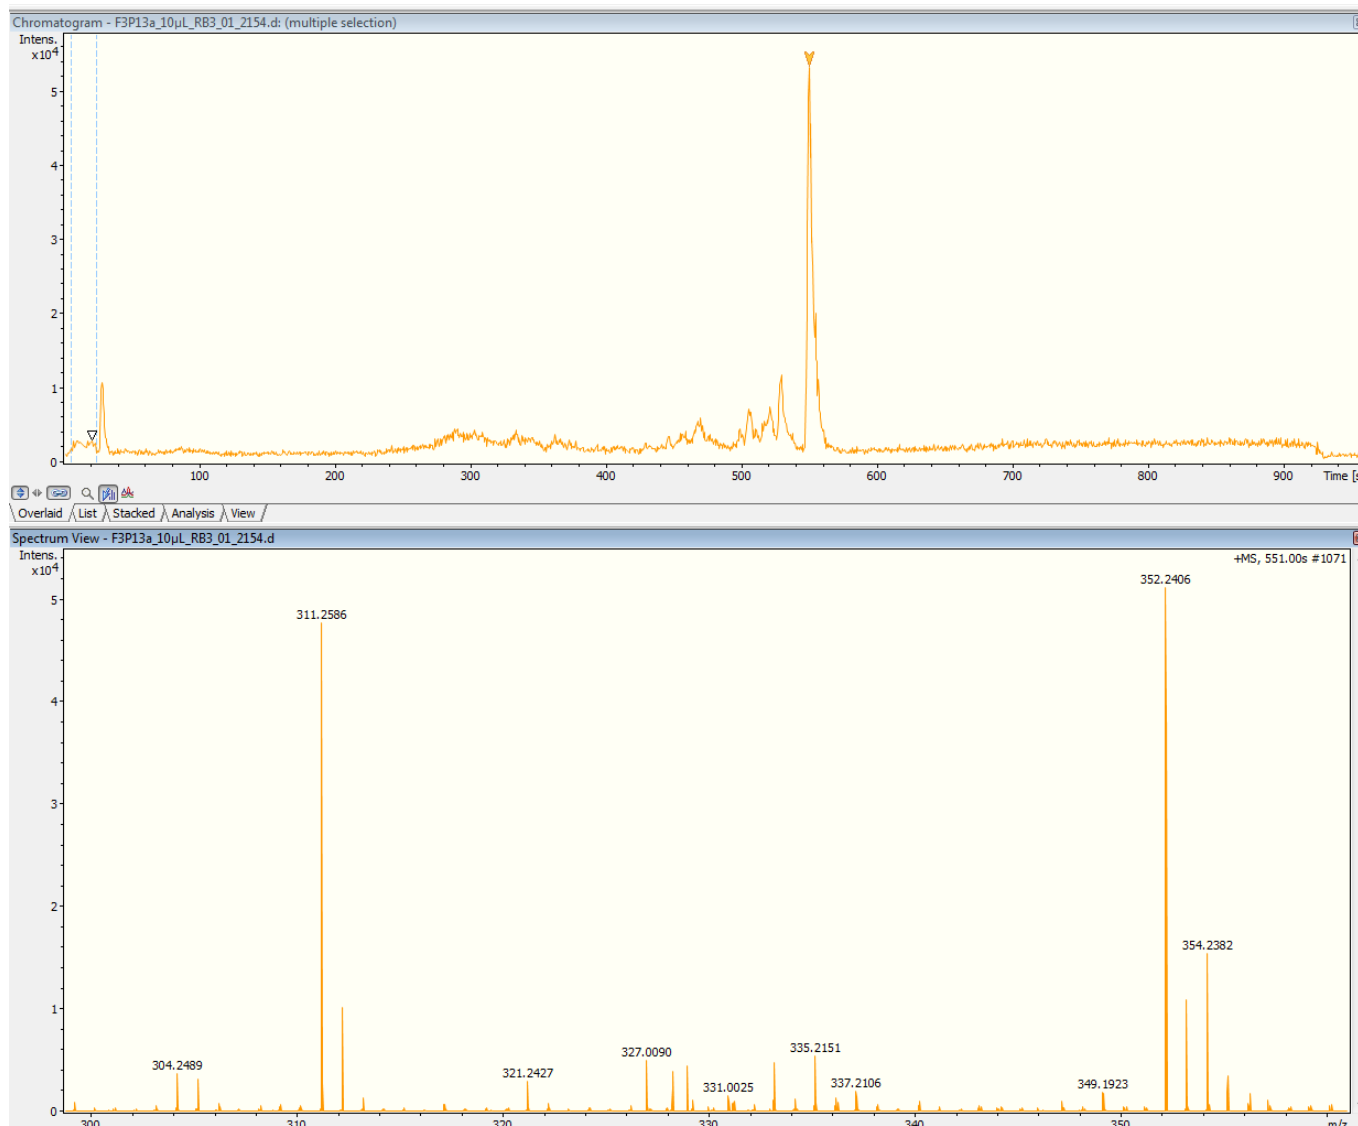

HR-(+)ESIMS spectrum of **1**



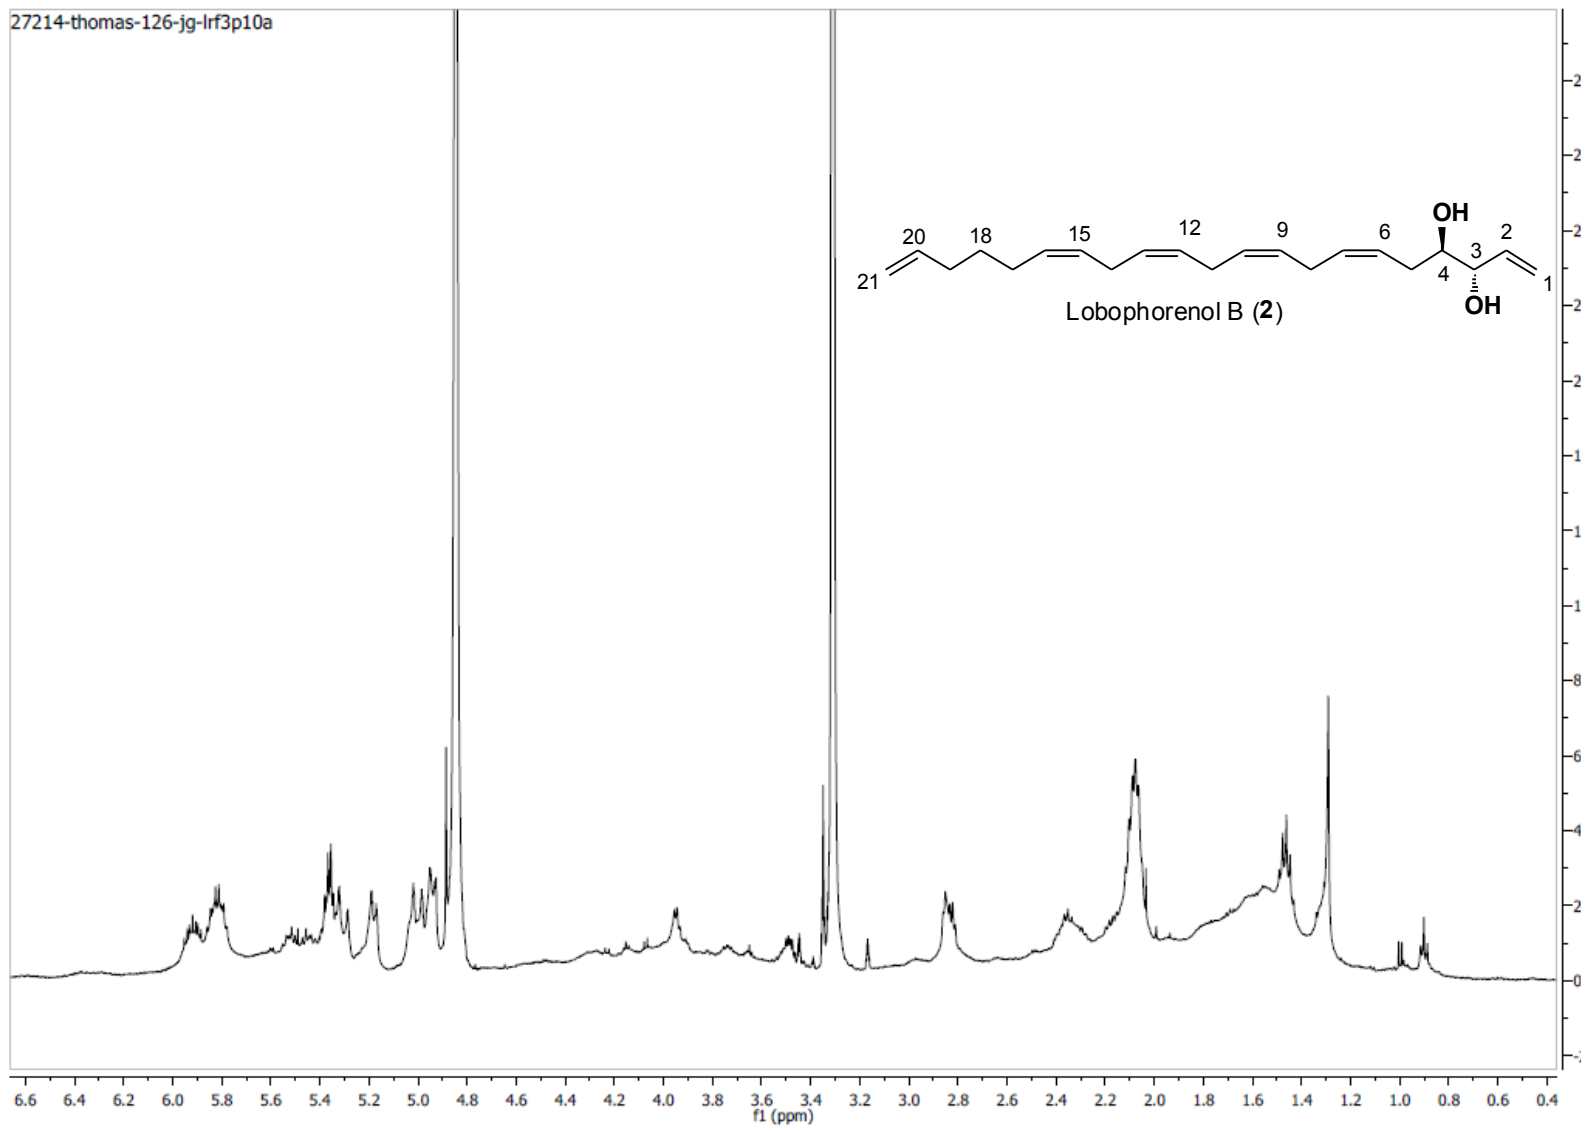

$^1\text{H}$  NMR spectrum of **2** in  $\text{CD}_3\text{OD}$  (500 MHz)

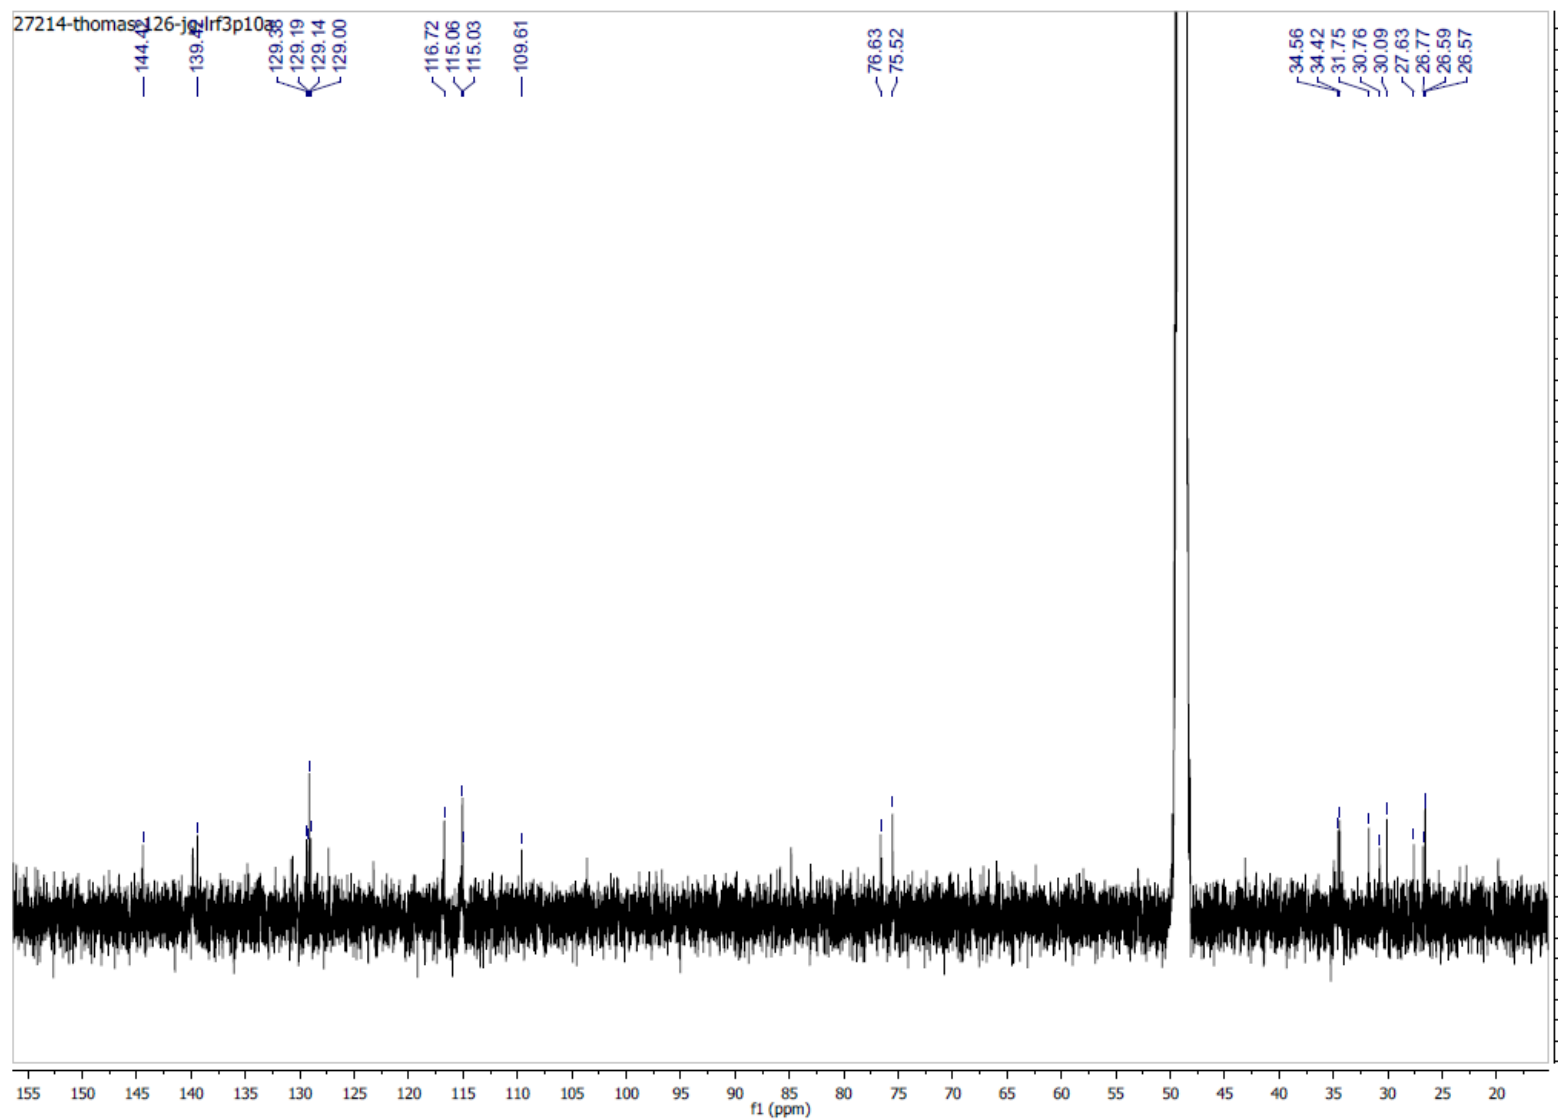

$^{13}\text{C}$  NMR spectrum of **2** in  $\text{CD}_3\text{OD}$  (125 MHz)

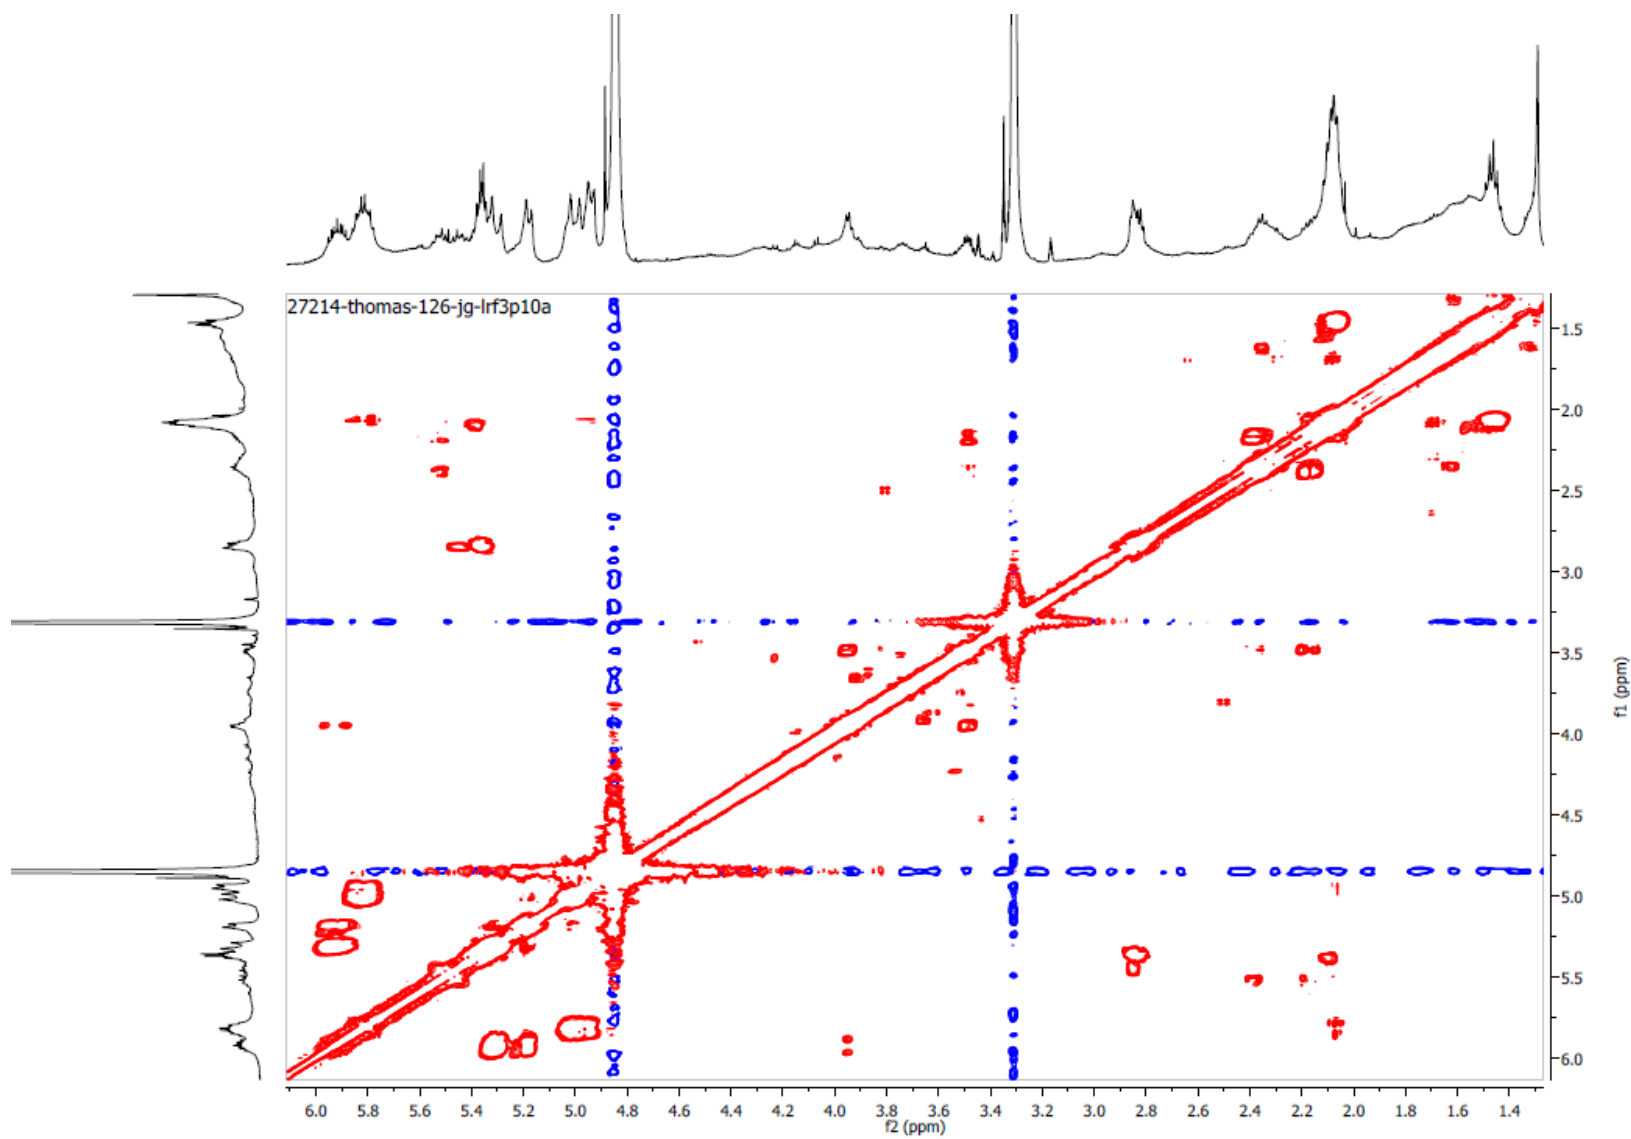

COSY NMR spectrum of **2** in CD<sub>3</sub>OD (500 MHz)

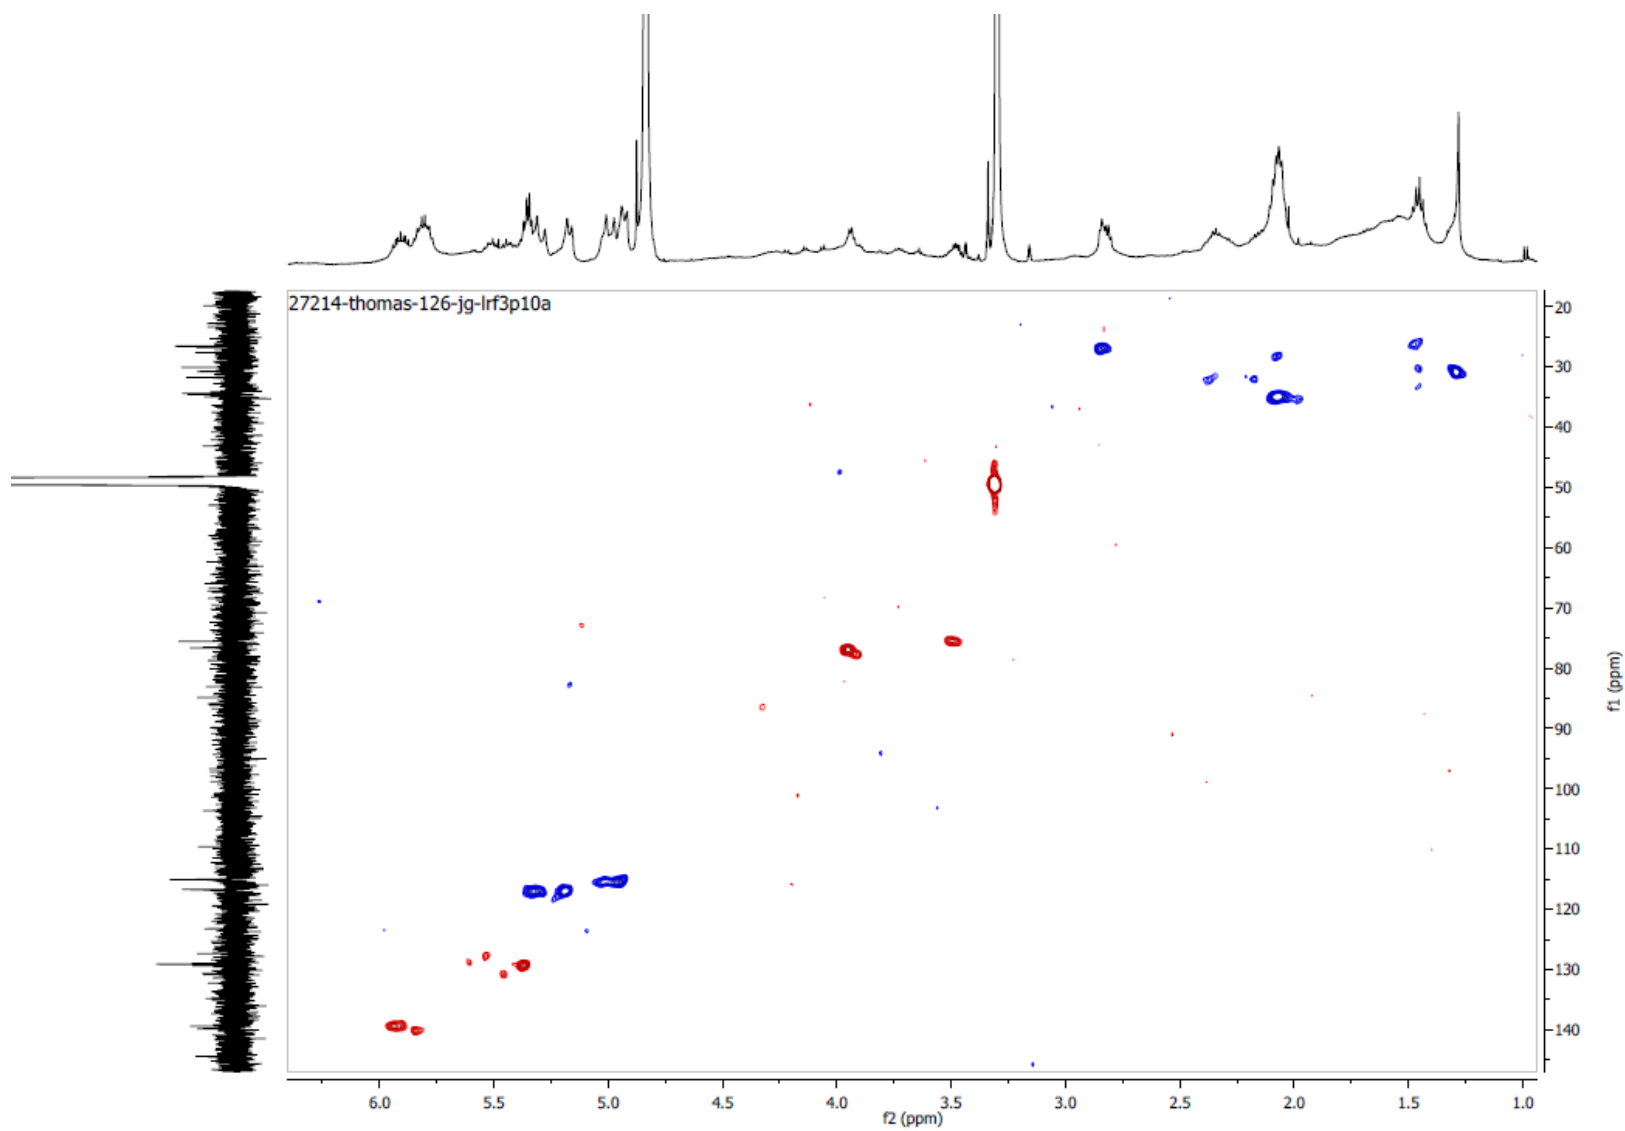

HSQC NMR spectrum of **2** in CD<sub>3</sub>OD (500 MHz)

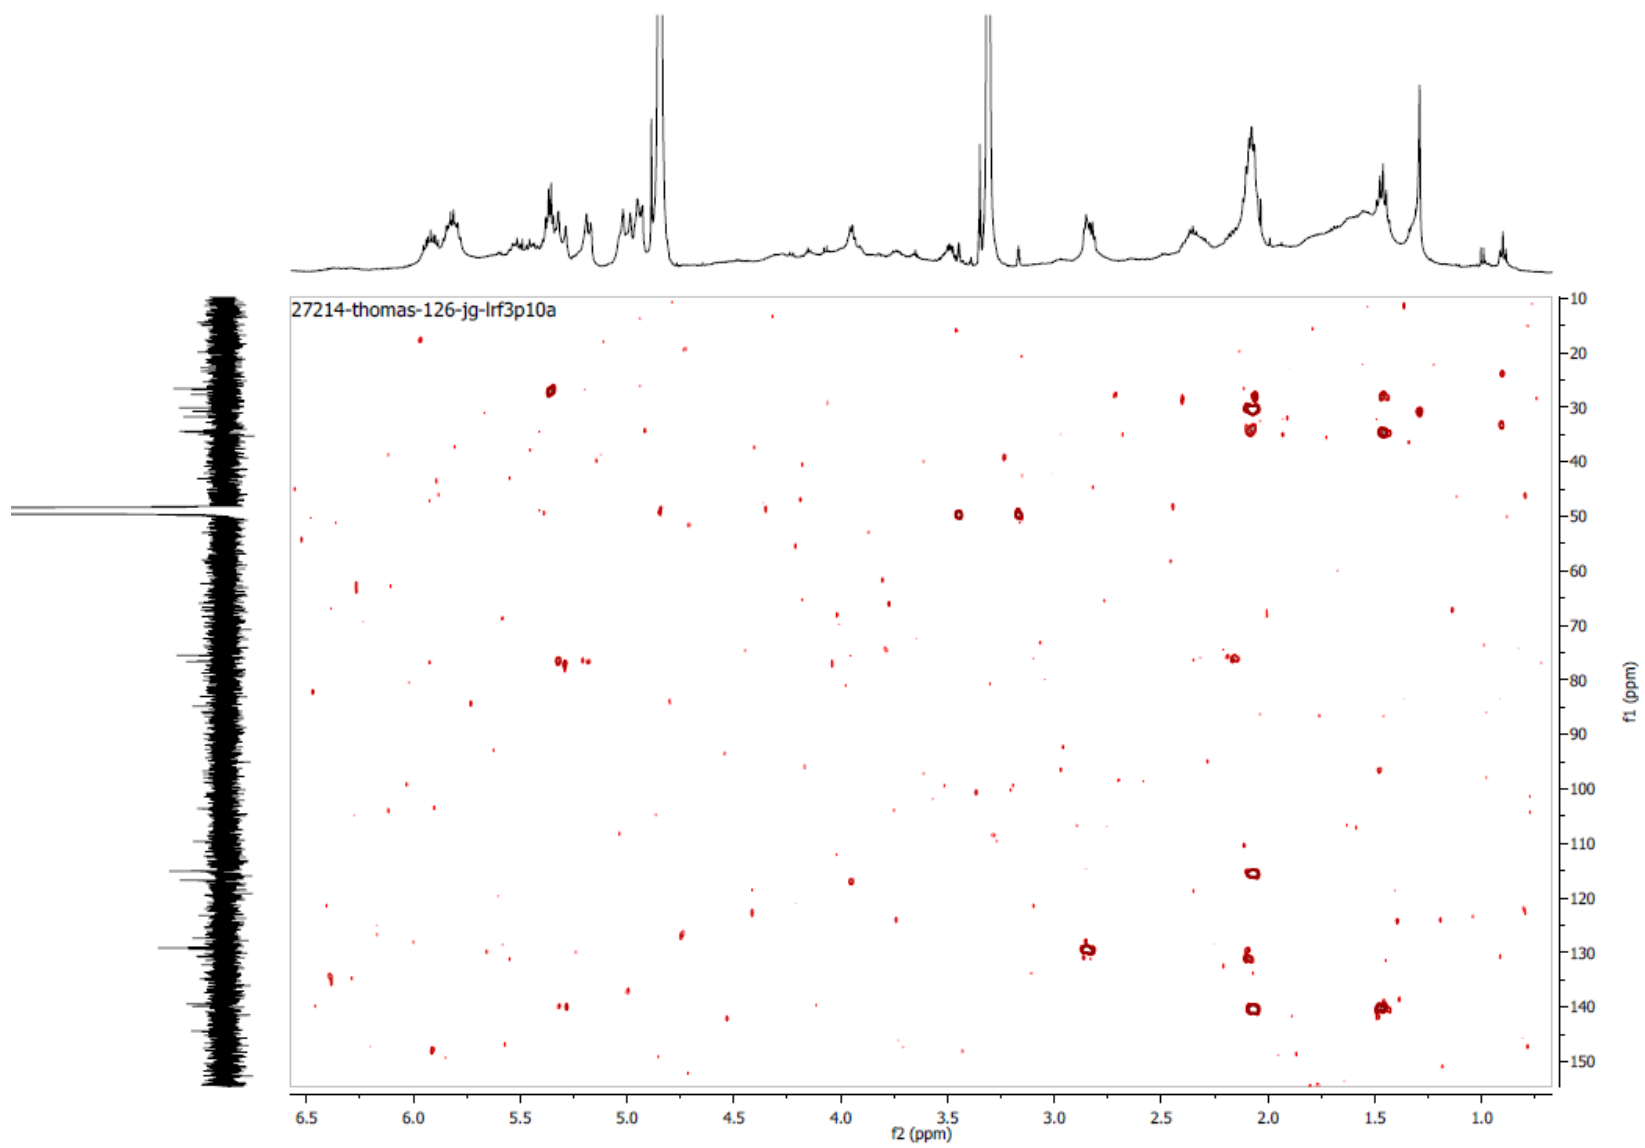

HMBC NMR spectrum of **2** in CD<sub>3</sub>OD (500 MHz)

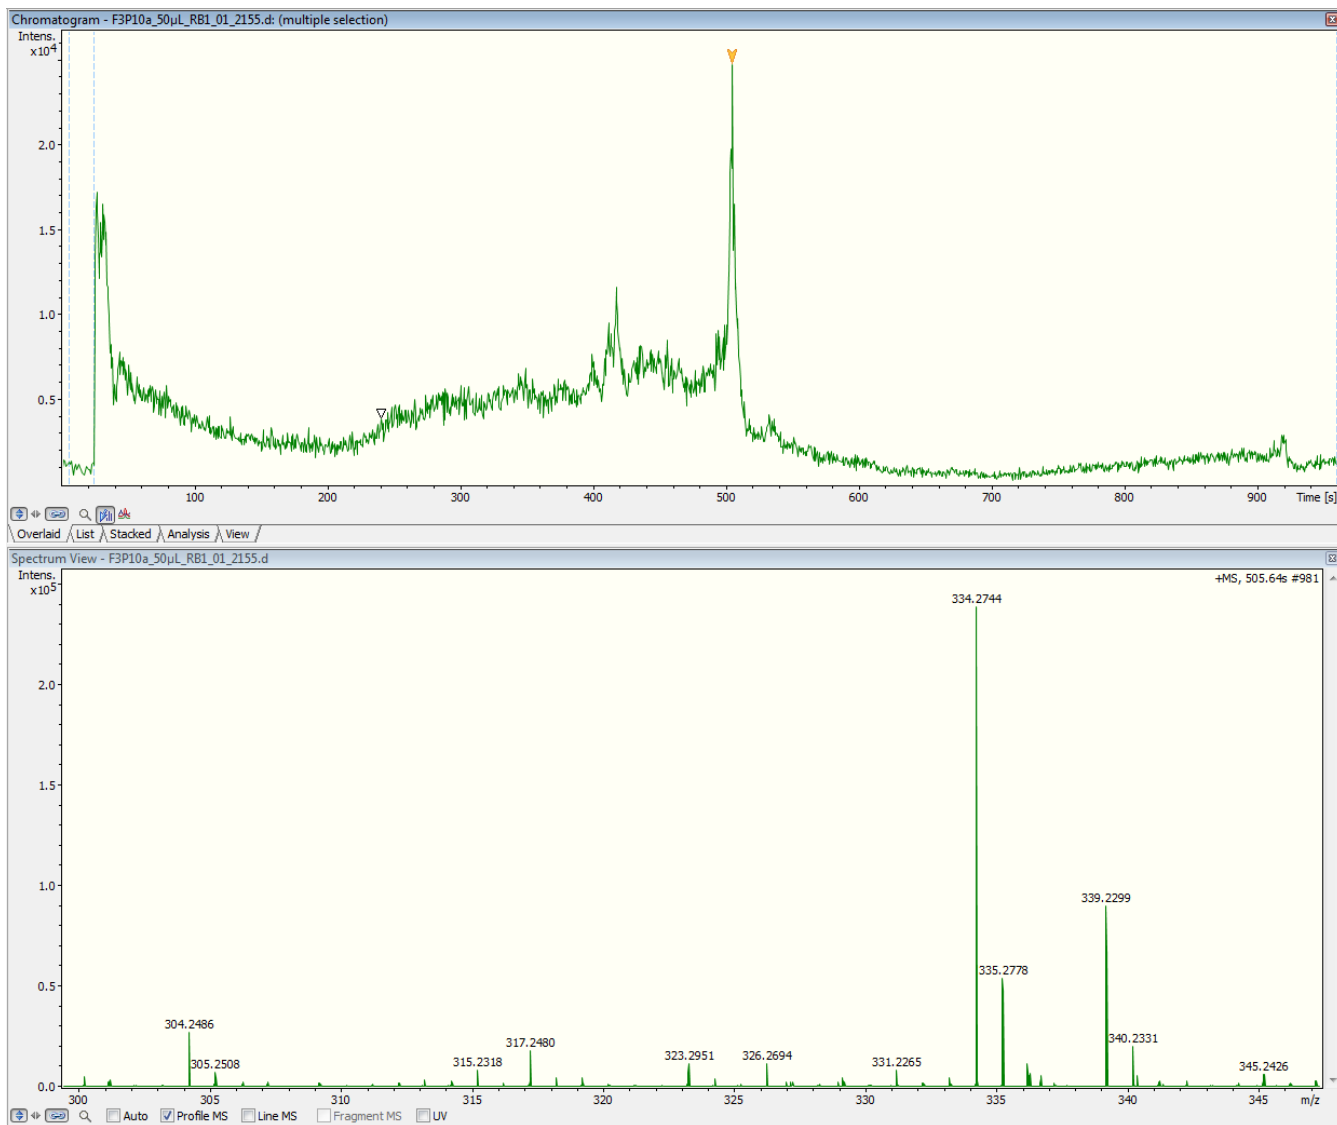

HR-(+)ESIMS spectrum of **2**

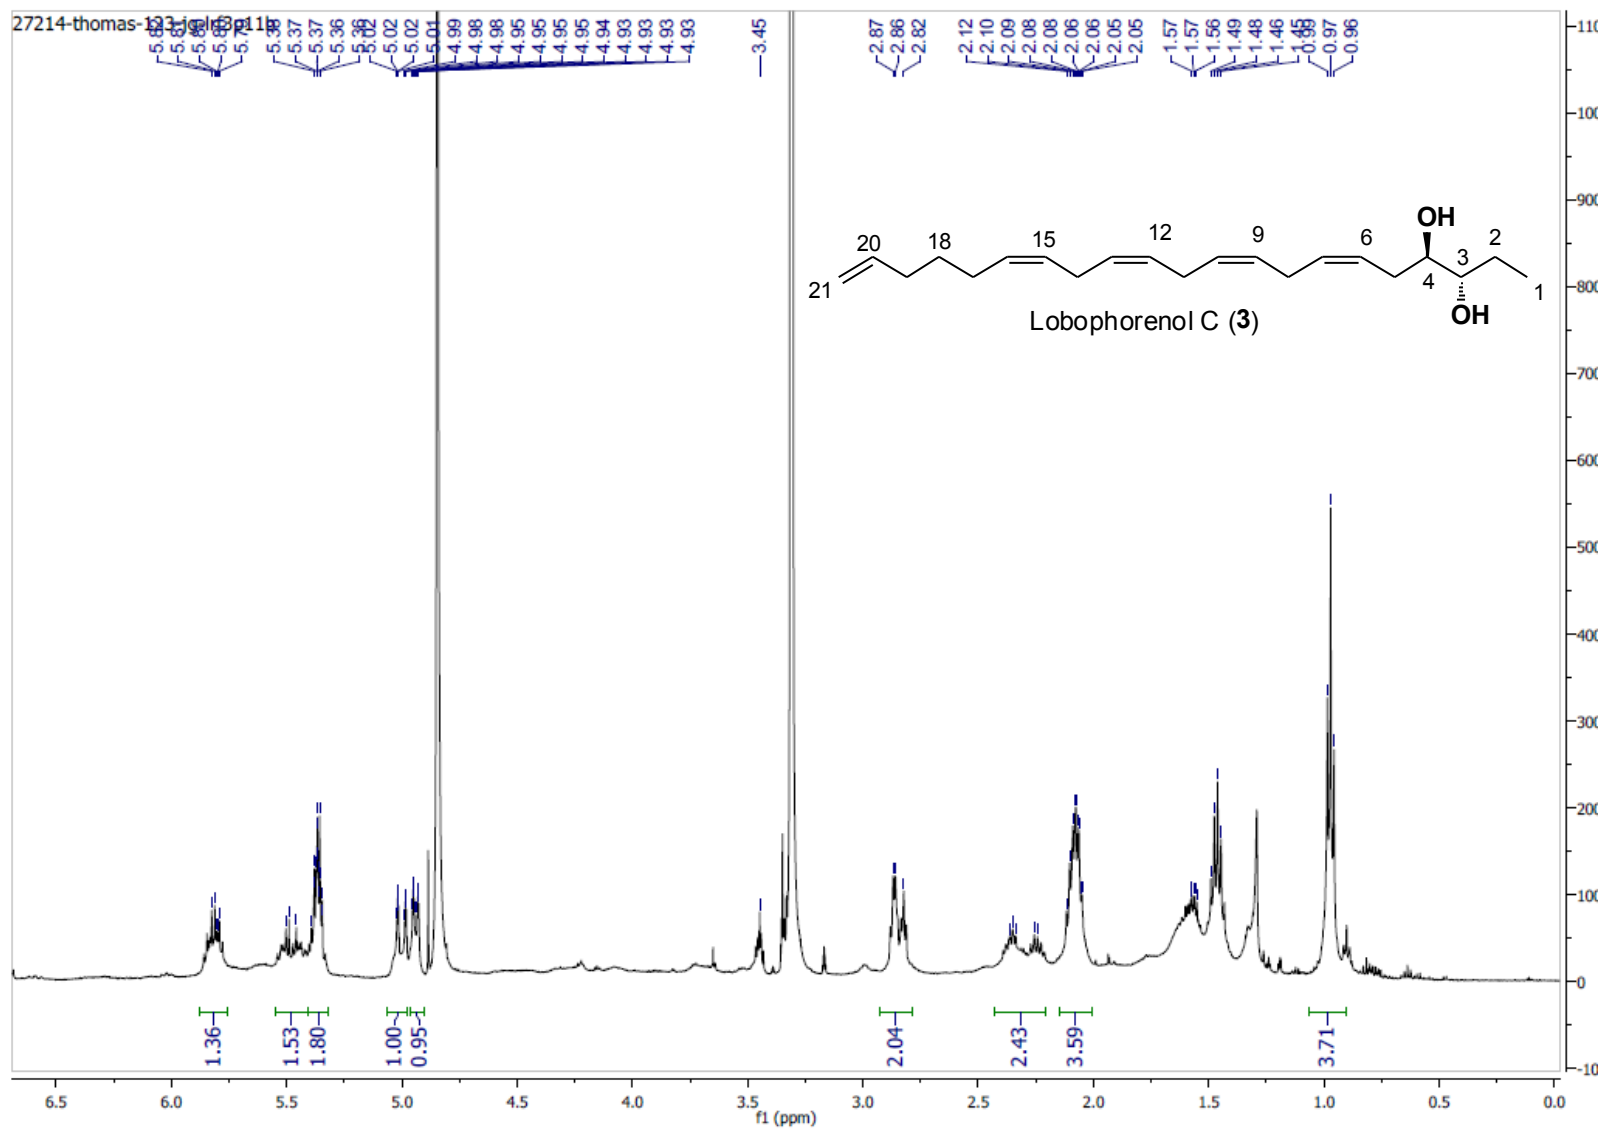

$^1\text{H}$  NMR spectrum of **3** in  $\text{CD}_3\text{OD}$  (500 MHz)

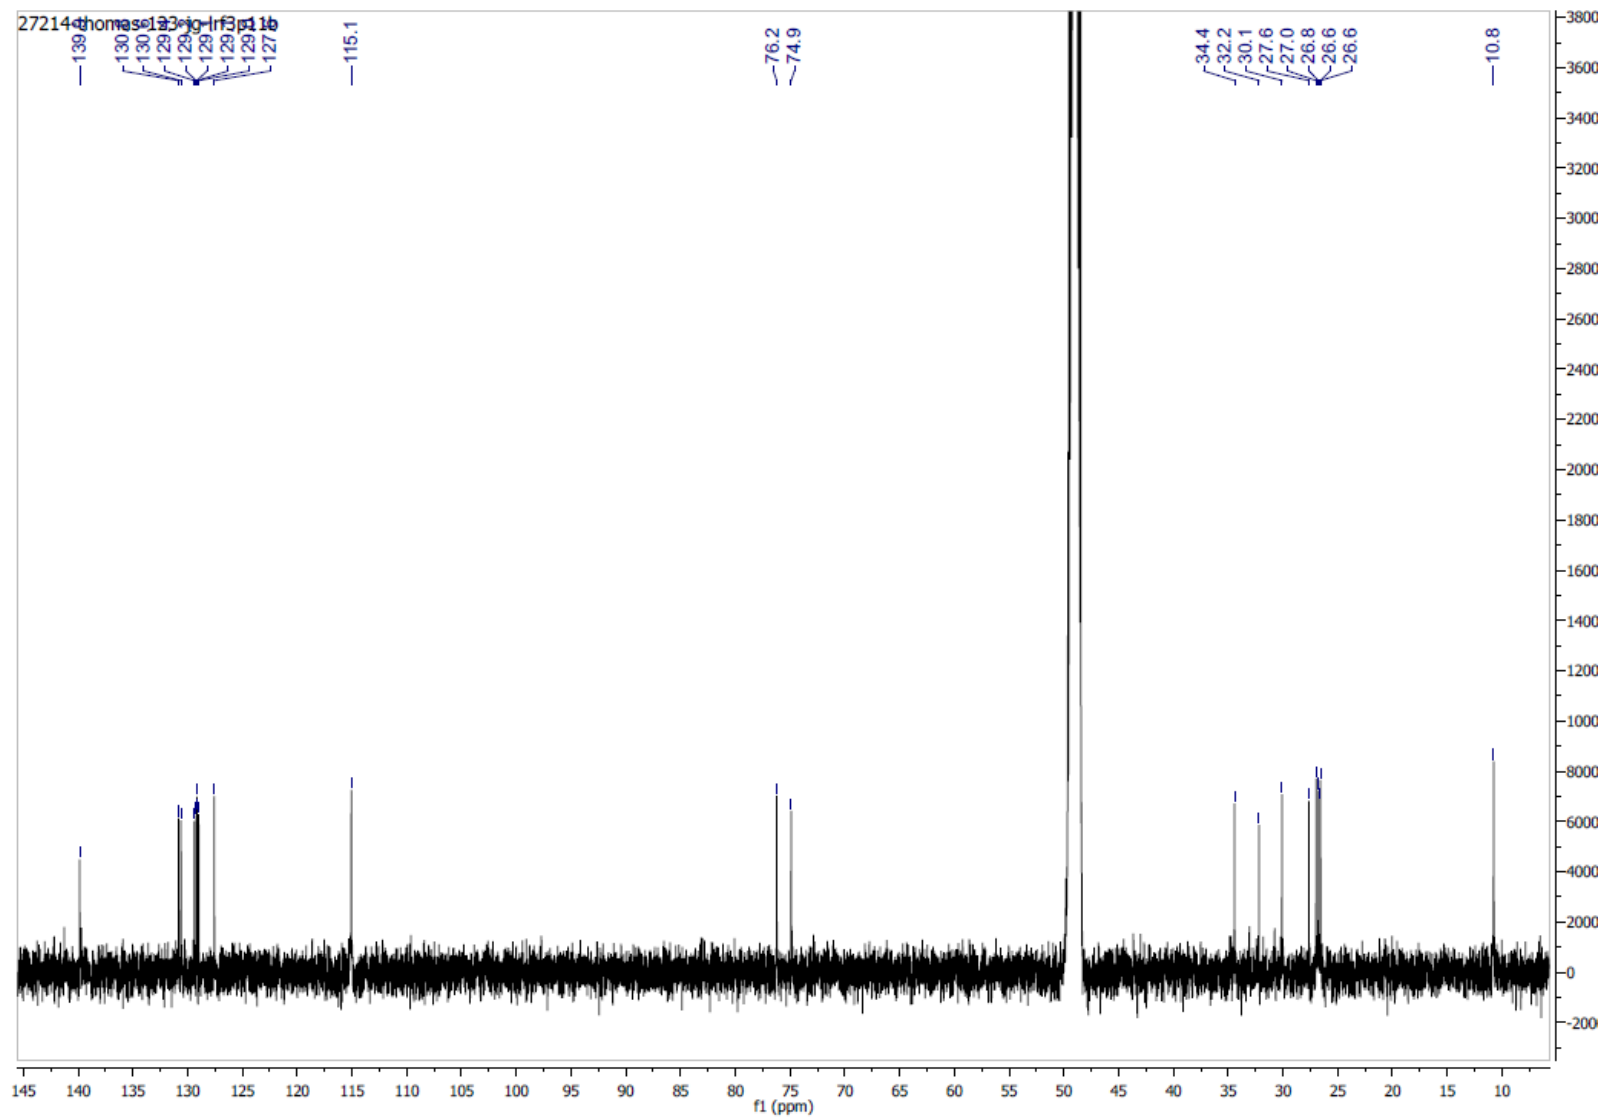

$^{13}\text{C}$  NMR spectrum of **3** in  $\text{CD}_3\text{OD}$  (125 MHz)



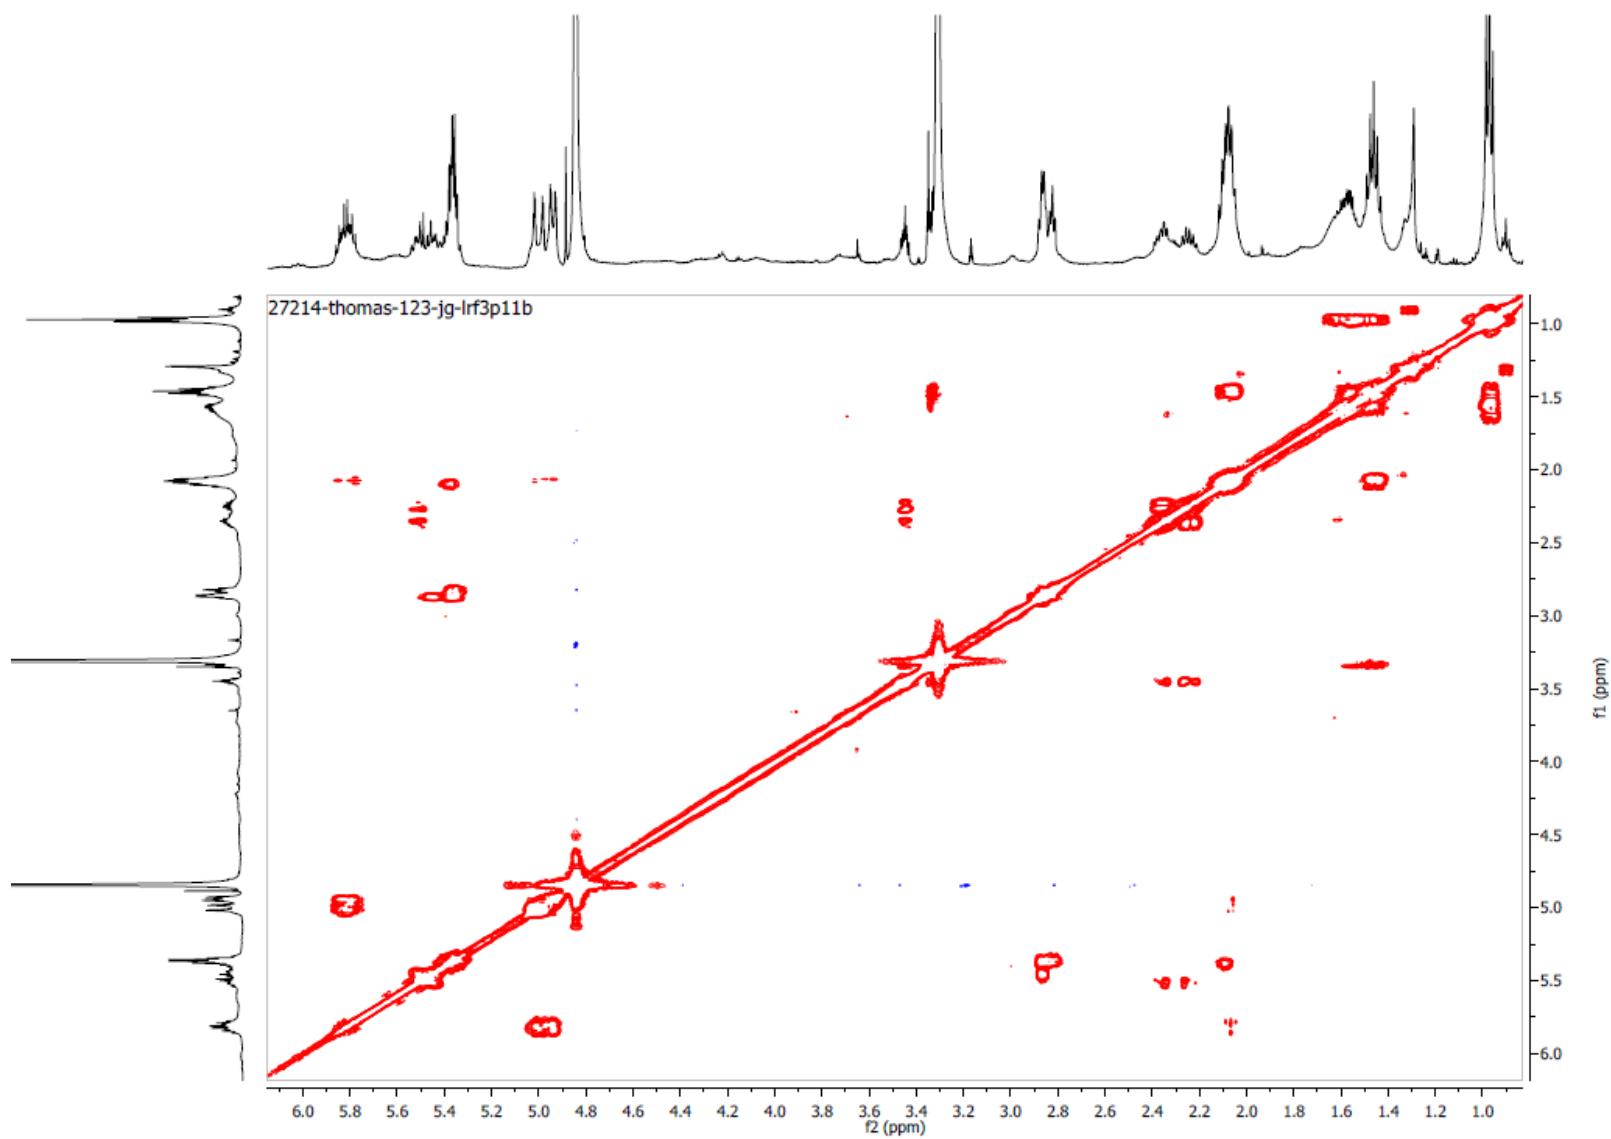

COSY NMR spectrum of **3** in CD<sub>3</sub>OD (500 MHz)

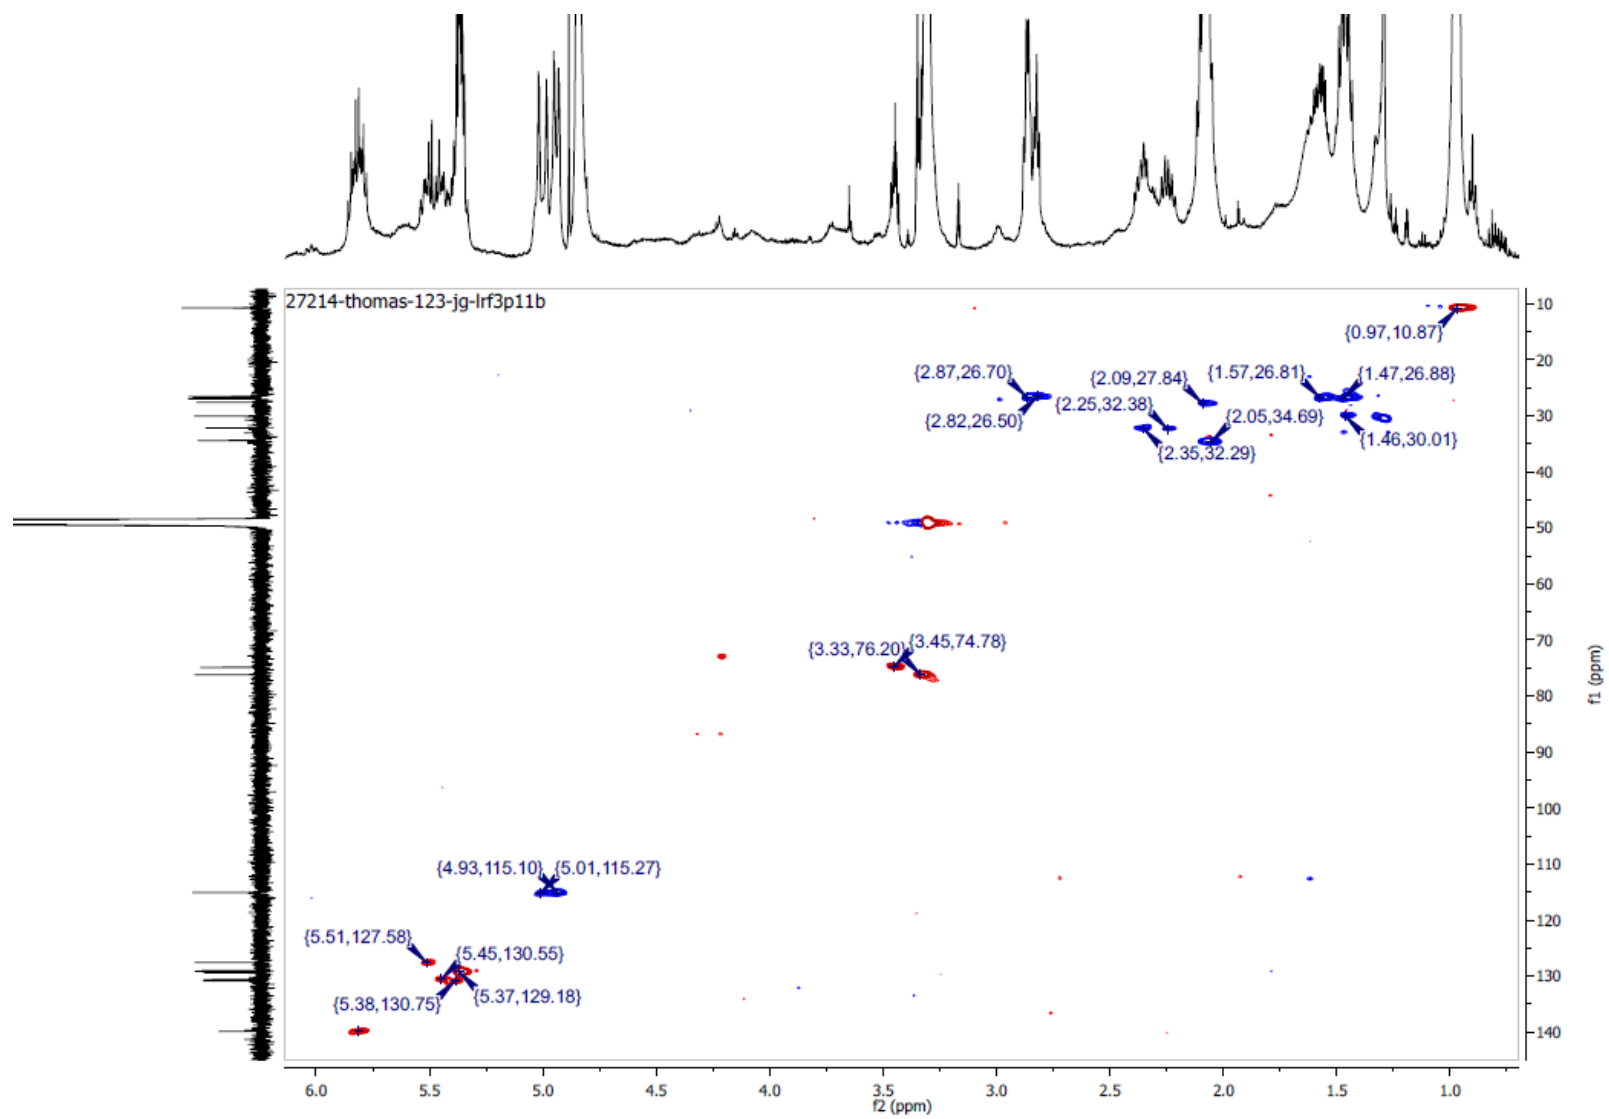

HSQC NMR spectrum of **3** in CD<sub>3</sub>OD (500 MHz)

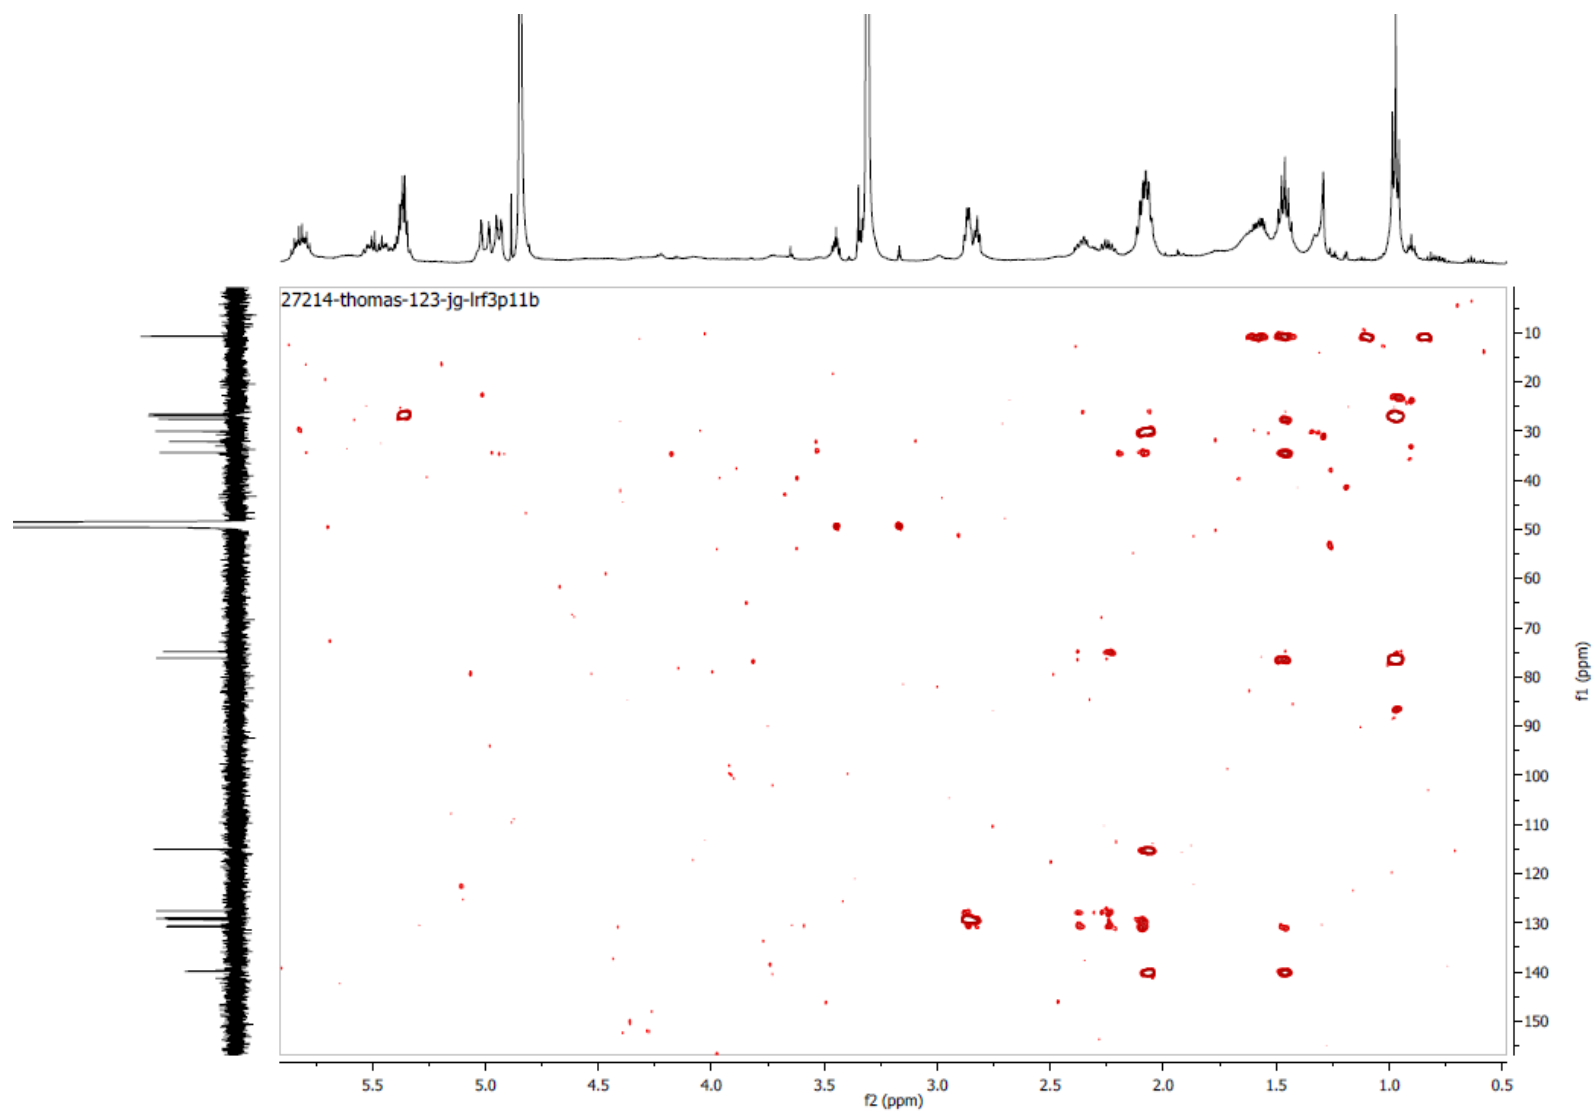

HMBC NMR spectrum of **3** in CD<sub>3</sub>OD (500 MHz)

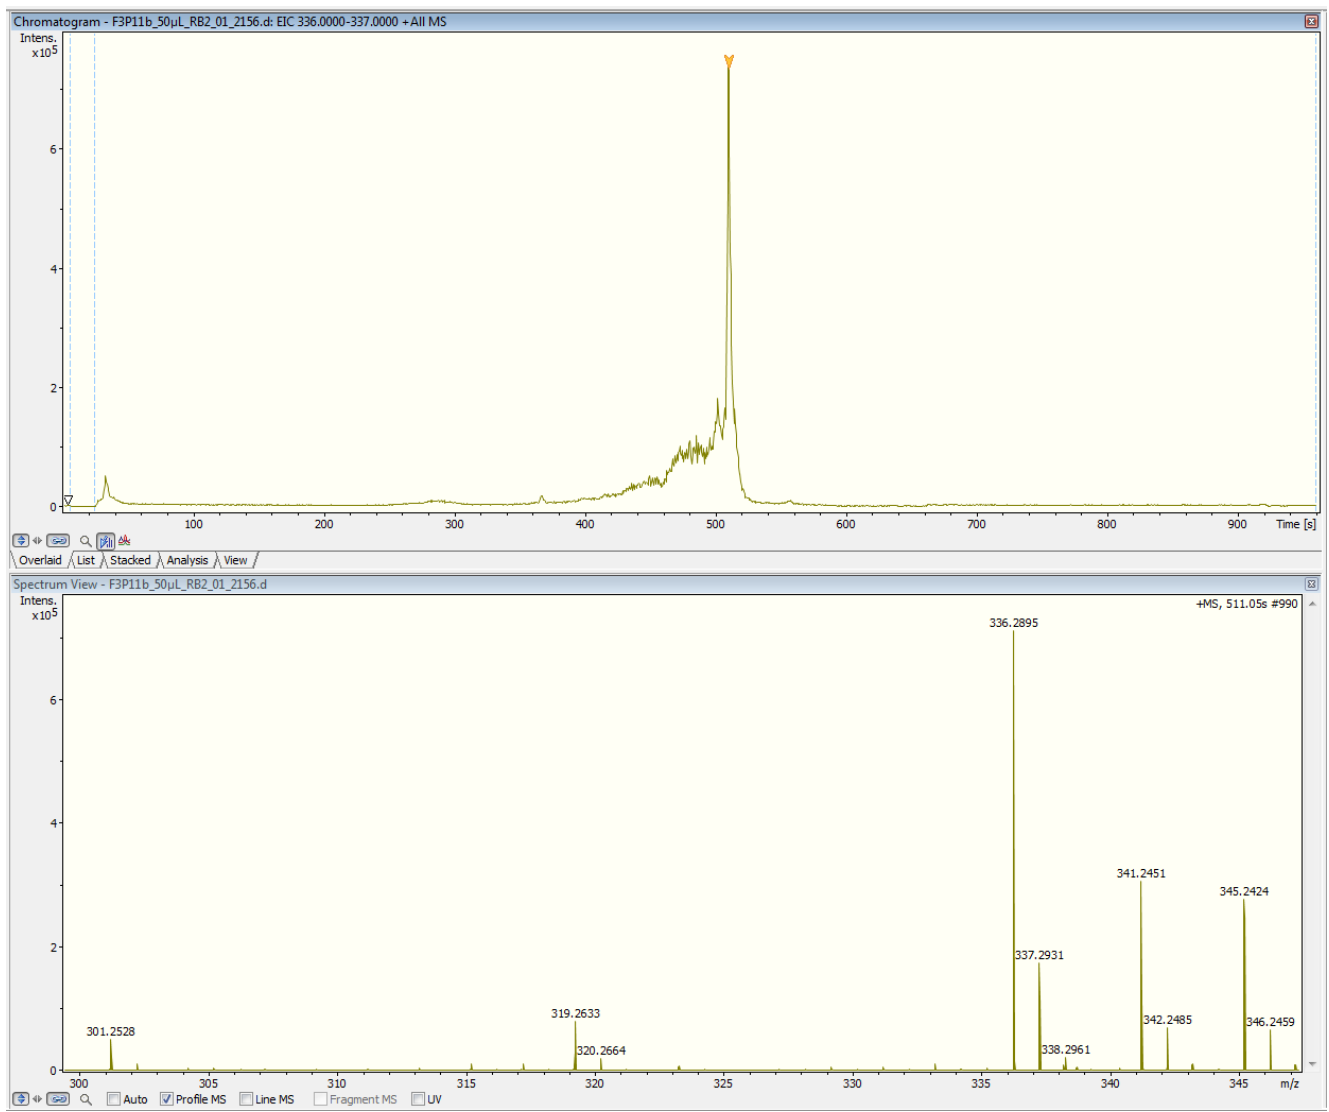

HR-(+)ESIMS of **3**

### Assessment of the relative seafloor cover and quantification of *Lobophora*-corals association

Relative seafloor cover (i.e. corals, macroalgae, other benthic organisms) and quantification of *Lobophora*-corals association, assessed with the horizontal belt transect, was determined using the digital image processing software Coral Point Count with Excel extensions. Individual pictures were sub-divided into 4 rows and 4 columns, and each cell was populated with 1 random point lying within the cell borders. The circle with crosshairs with a diameter of 150 pixels was chosen as data point object shape. The feature lying under the circle-crosshairs was identified and recorded. If the crosshairs fell on a coral or *Lobophora*, the occurrence of the alga in direct contact with the coral within the circle was inspected and recorded.

**Table S1. Sampling locations of *Lobophora* species in New Caledonia.**

| Species                     | Location    | Reef type          | Latitude     | Longitude     | Substrate |
|-----------------------------|-------------|--------------------|--------------|---------------|-----------|
| <i>Lobophora abscondita</i> | Bovis       | Fringing reef      | 22° 13.488'S | 166° 20.775'E | Coral     |
| <i>Lobophora crassa</i>     | Ricaudy     | Fringing reef      | 22° 18.914'S | 166° 27.453'E | Rubble    |
| <i>Lobophora dimorpha</i>   | Crouy       | Patch reef         | 22° 21.919'S | 166° 21.898'E | Coral     |
| <i>Lobophora hederacea</i>  | Abore       | Inner barrier reef | 22° 27.022'S | 166° 22.441'E | Coral     |
| <i>Lobophora monticola</i>  | Saint Marie | Islet reef         | 22° 17.863'S | 166° 28.898'E | Coral     |
| <i>Lobophora nigrescens</i> | Crouy       | Patch reef         | 22° 21.114'S | 166° 21.084'E | Sand      |
| <i>Lobophora rosacea</i>    | Ricaudy     | Fringing reef      | 22° 18.919'S | 166° 27.463'E | Coral     |
| <i>Lobophora undulata</i>   | Larègnère   | Islet reef         | 22° 19.548'S | 166° 18.948'E | Coral     |

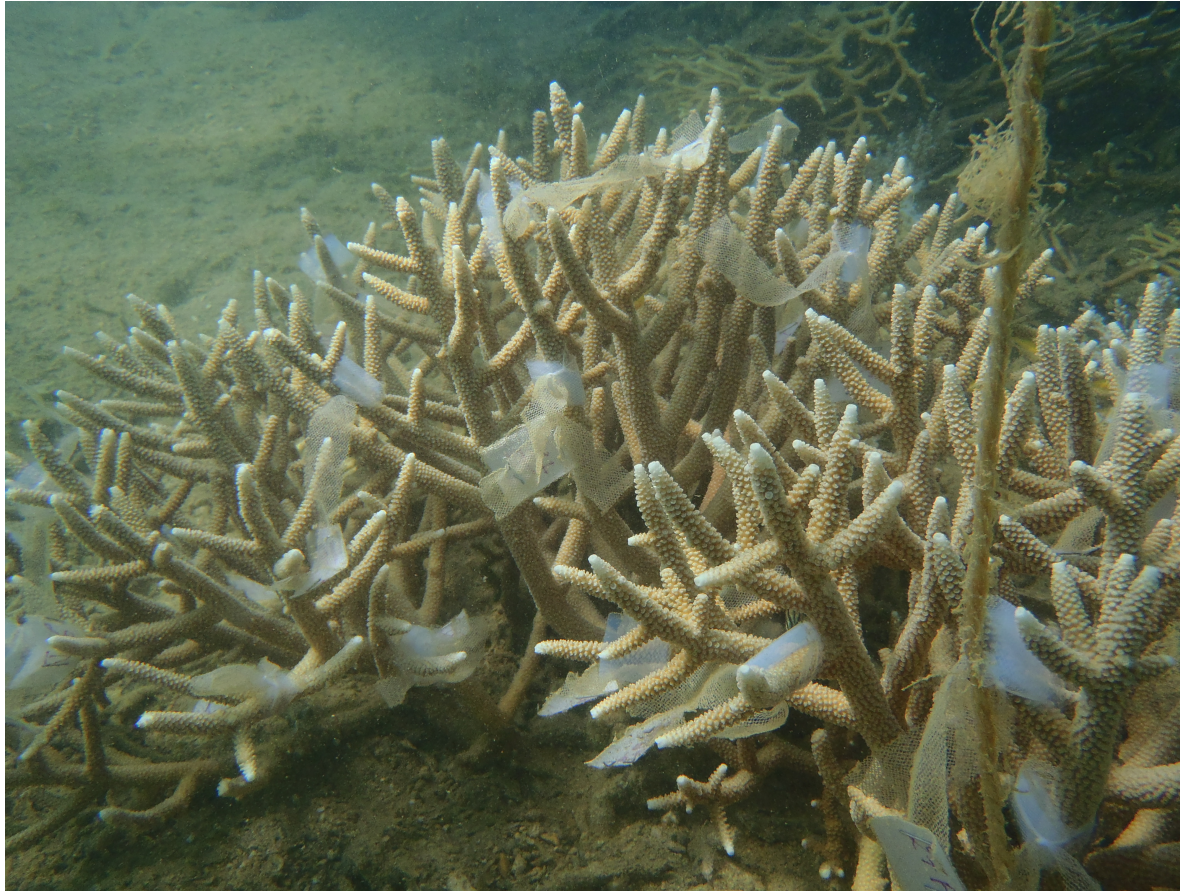

**Figure S1.** *In situ* allelopathic bioassays. Photo credit: Christophe Vieira
